# Supplementary material for: Thorough Investigation of the Phenolic Profile of Reputable Greek Honey Varieties: Varietal Discrimination and Floral Markers Identification Using Liquid Chromatography–High-Resolution Mass Spectrometry
Source: MDPI journal article supplement (doi:10.3390/molecules27144444), 2022-07-11
Supplement: s1 [file s1]

## ELECTRONIC SUPPLEMENTARY MATERIAL

Thorough investigation of phenolic profile of reputable Greek honey varieties: Varietal discrimination and floral markers identification using Liquid Chromatography - High Resolution Mass Spectrometry

**Georgios A. Koulis, Aristeidis S. Tsagkaris, Panagiota A. Katsianou, Panagiotis-Loukas P. Gialouris, Ioannis Martakos, Fotis Stergiou, Alberto Fiore, Eleni I. Panagopoulou, Sofia Karabournioti, Carsten Baessmann, Noud van der Borg, Marilena Dasenaki, Charalampos Proestos and Nikolaos S. Thomaidis**

## 1. Whisker's plots for the target analytes

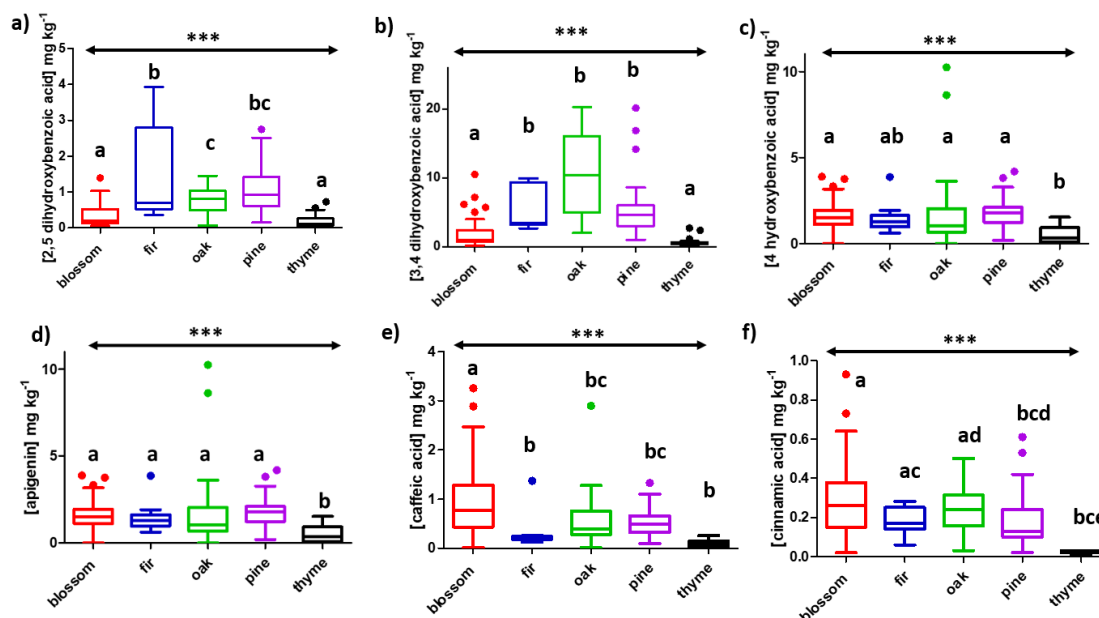

**Figure S1.** Whisker's plot for a) 2,5-dihydroxybenzoic acid, b) 3,4-dihydroxybenzoic acid, c) 4-hydroxybenzoic acid, d) apigenin, e) caffeic acid and f) cinnamic acid performed at the 95% confidence level; \*\*\*: p-value < 0.001. Tukey's multiple comparison test was also performed and different letters indicate significant differences among the groups.

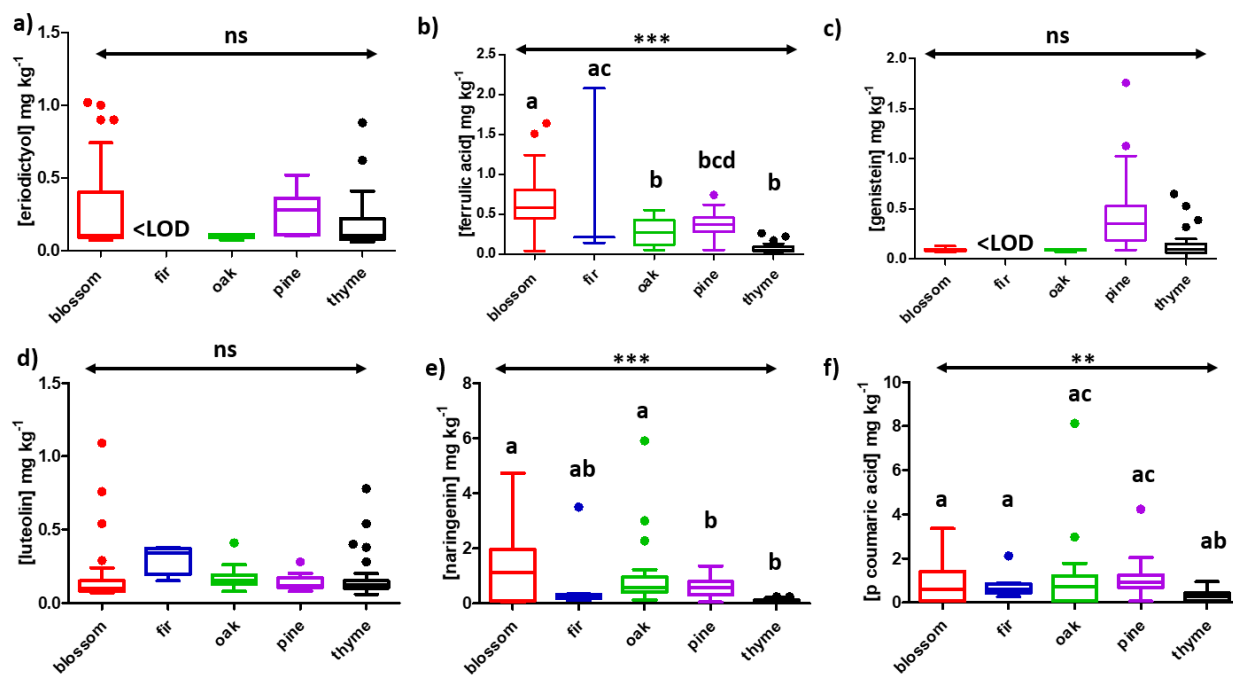

**Figure S2.** Whisker's plot for a) eriodictyol, b) ferulic acid c) genistein, d) luteolin, e) naringenin and f) p-coumaric acid performed at the 95% confidence level; \*\*\*: p-value < 0.001, \*\*: p-value < 0.01, ns: p-value > 0.05.

value<0.01. Tukey's multiple comparison test was also performed and different letters indicate significant differences among the groups.

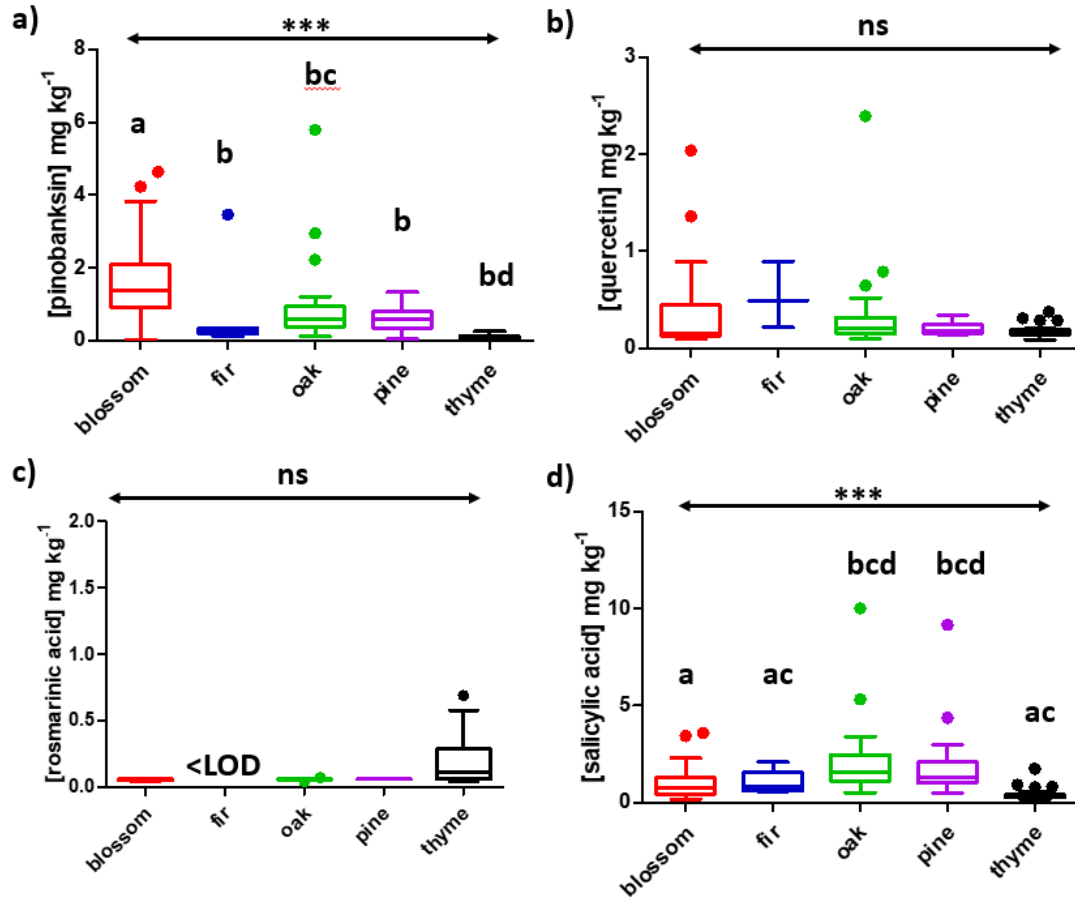

**Figure S3.** Whisker's plot for a) pinobanksin, b) quercetin, c) rosmarinic acid and d) salicylic acid performed at the 95% confidence level; \*\*\*: p-value< 0.001. Tukey's multiple comparison test was also performed and different letters indicate significant differences among the groups.

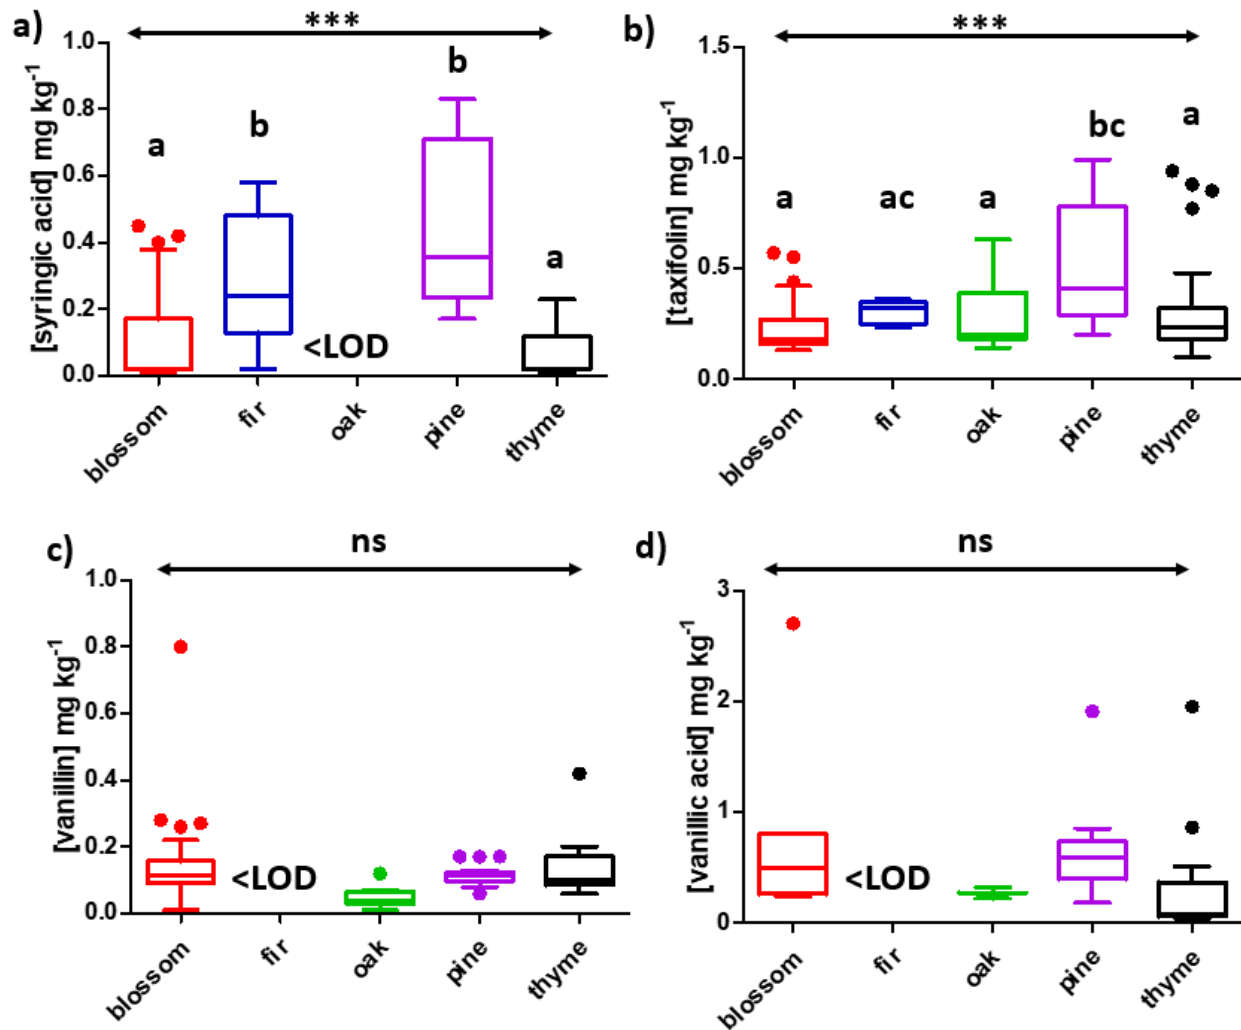

**Figure S4.** Whisker's plot for a) syringic acid, b) taxifolin c) vanillin and d) vanillic acid performed at the 95% confidence level; \*\*\*: p-value < 0.001. Tukey's multiple comparison test was also performed and different letters indicate significant differences among the groups.

## Supporting information for suspect screening results

**Table S1.** Number of samples of each botanical origin that have been identified each compound

| Compound                      | Blossom (#62) | Oak (#24) | Pine (#39) | thyme (#34) | fir (#10) |
|-------------------------------|---------------|-----------|------------|-------------|-----------|
| 2-cis,4-trans-abscisic acid   | 39            | 24        | 31         | 25          | 9         |
| 2-trans,4-trans-abscisic acid | 29            | 22        | 24         | 12          | 8         |
| Acacetin                      | 54            | 24        | 36         | 1           | 9         |
| Dehydrovomifoliol             | 49            | 22        | 36         | 30          | 9         |
| Homogentisic Acid             | 9             | 6         | 5          | 5           | 1         |
| Isokaempferide                | 41            | 15        | 14         | 0           | 0         |
| Isorhamnetin                  | 34            | 20        | 18         | 15          | 7         |
| Lumichrome                    | 17            | 10        | 18         | 10          | 0         |
| Methyl Syringate              | 28            | 11        | 17         | 26          | 4         |
| Phenyllactic Acid             | 41            | 24        | 35         | 30          | 9         |
| Sakuranetin                   | 45            | 19        | 24         | 3           | 3         |
| Tectochrysin                  | 37            | 10        | 13         | 0           | 1         |

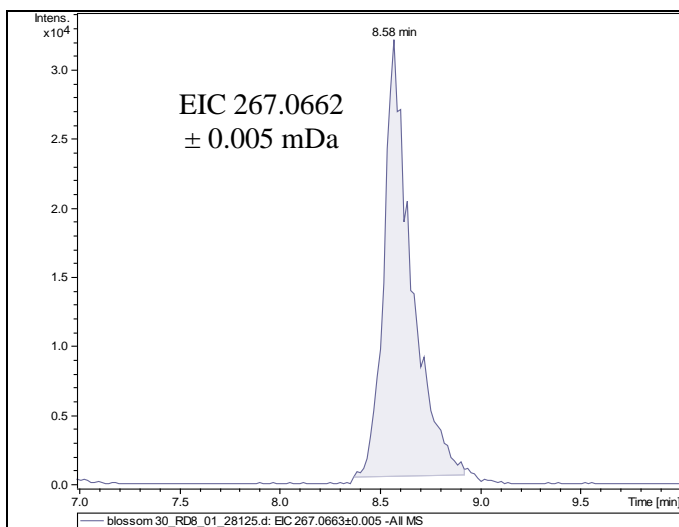

**Fig S5a.** EIC of m/z 267.0662 in a blossom Honey

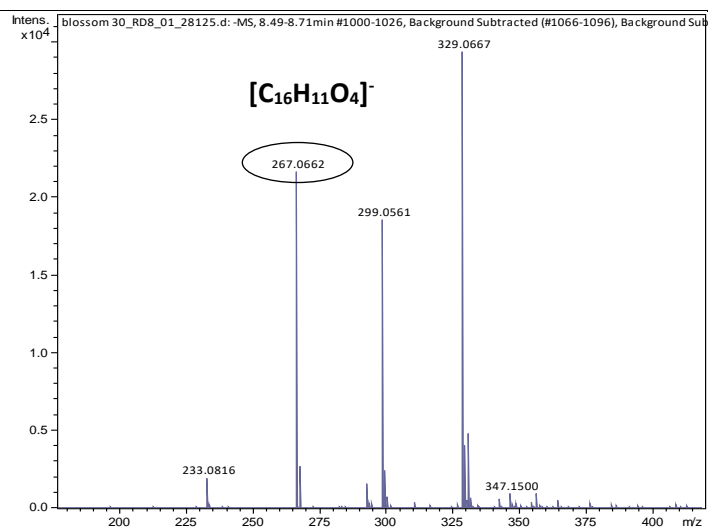

**Fig S5b.** Background subtracted MS Spectra from 8.5 to 8.7 min

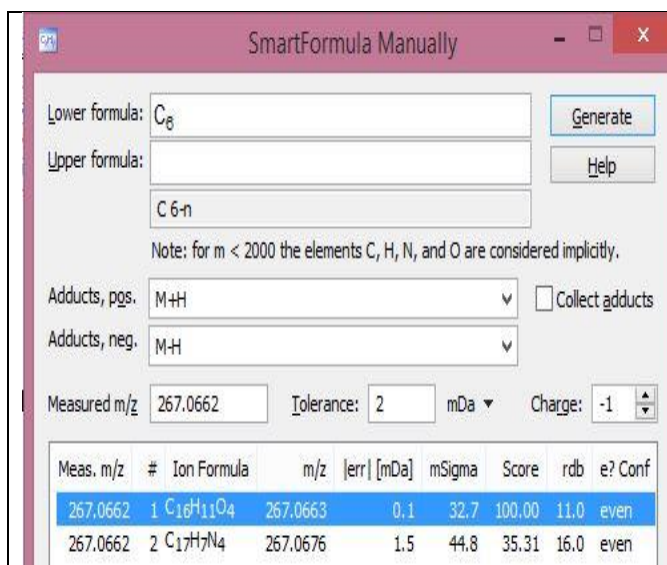

**Fig S5c.** Molecular Formula Annotation of m/z 267.0662

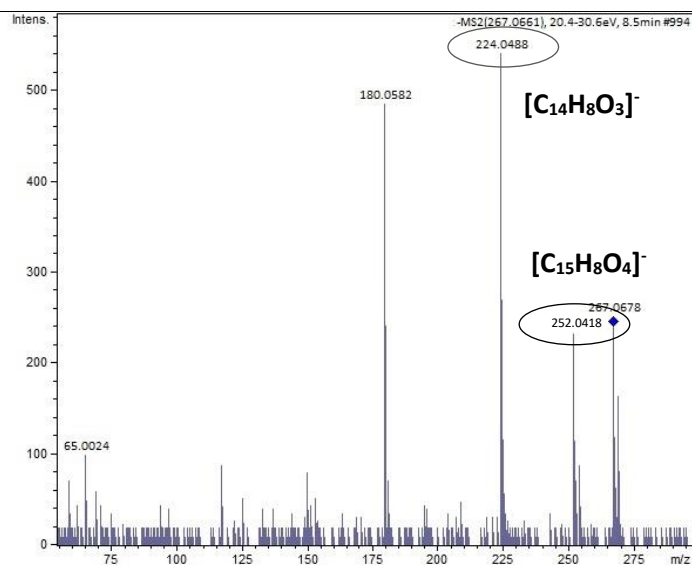

**Fig S5d.** DDA MS/MS Spectra of 267.0662

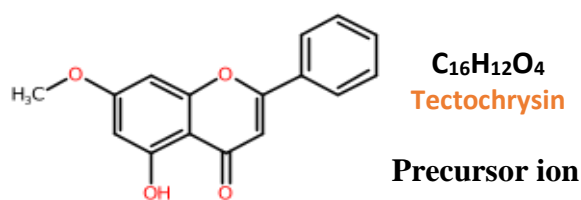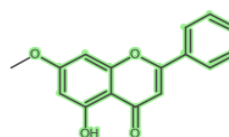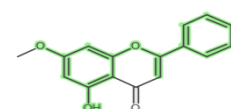

**Fragment ions**

**Fig S5e.** Structures of precursor and fragment ions of Tectochrysin

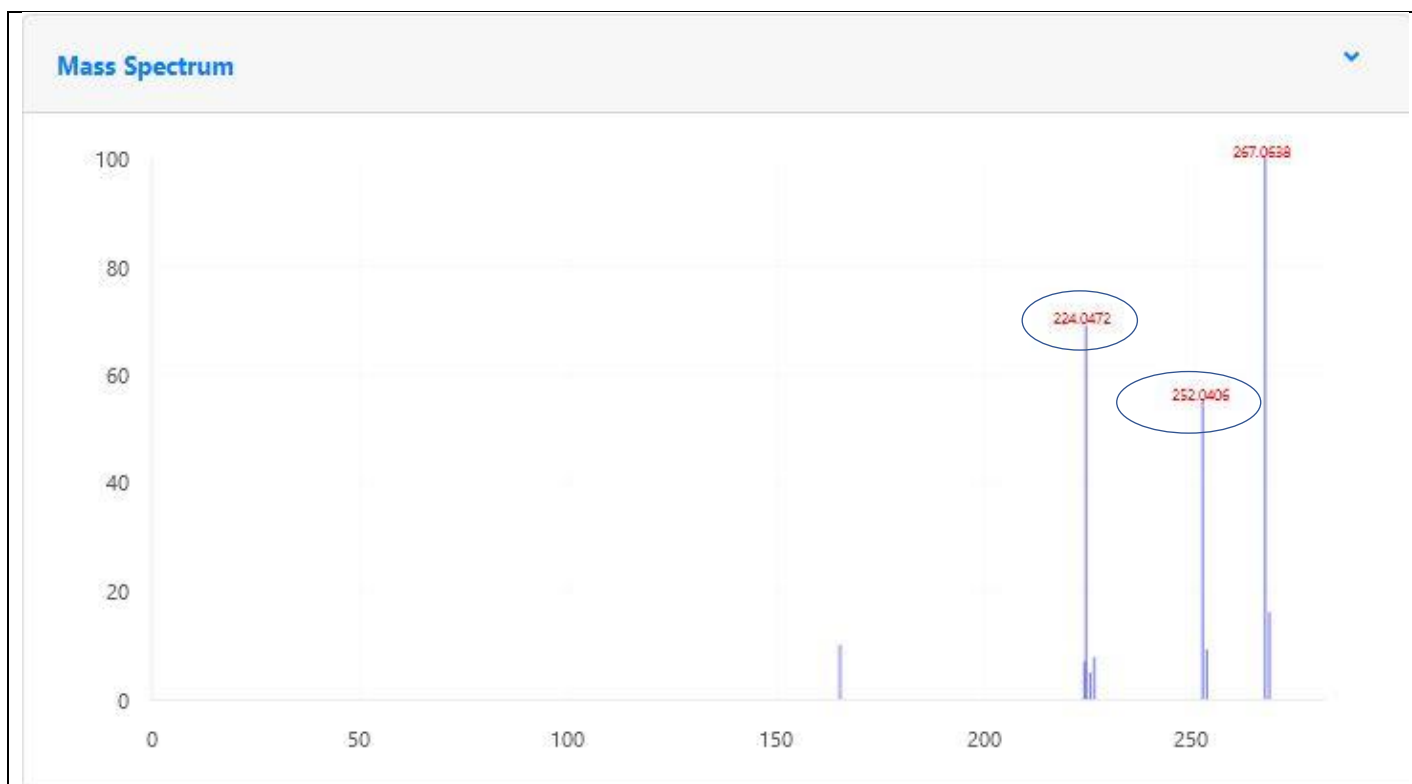

**Fig. S5f:** Bruker Sumner MetaboBASE Plant Library MetaboBASE0550 (Tectochrysin)

**Figure S5.** Identification data for the mass feature m/z 299.0561\_8.44 min (Tectochrysin)

## Supporting information for the non-targeted screening

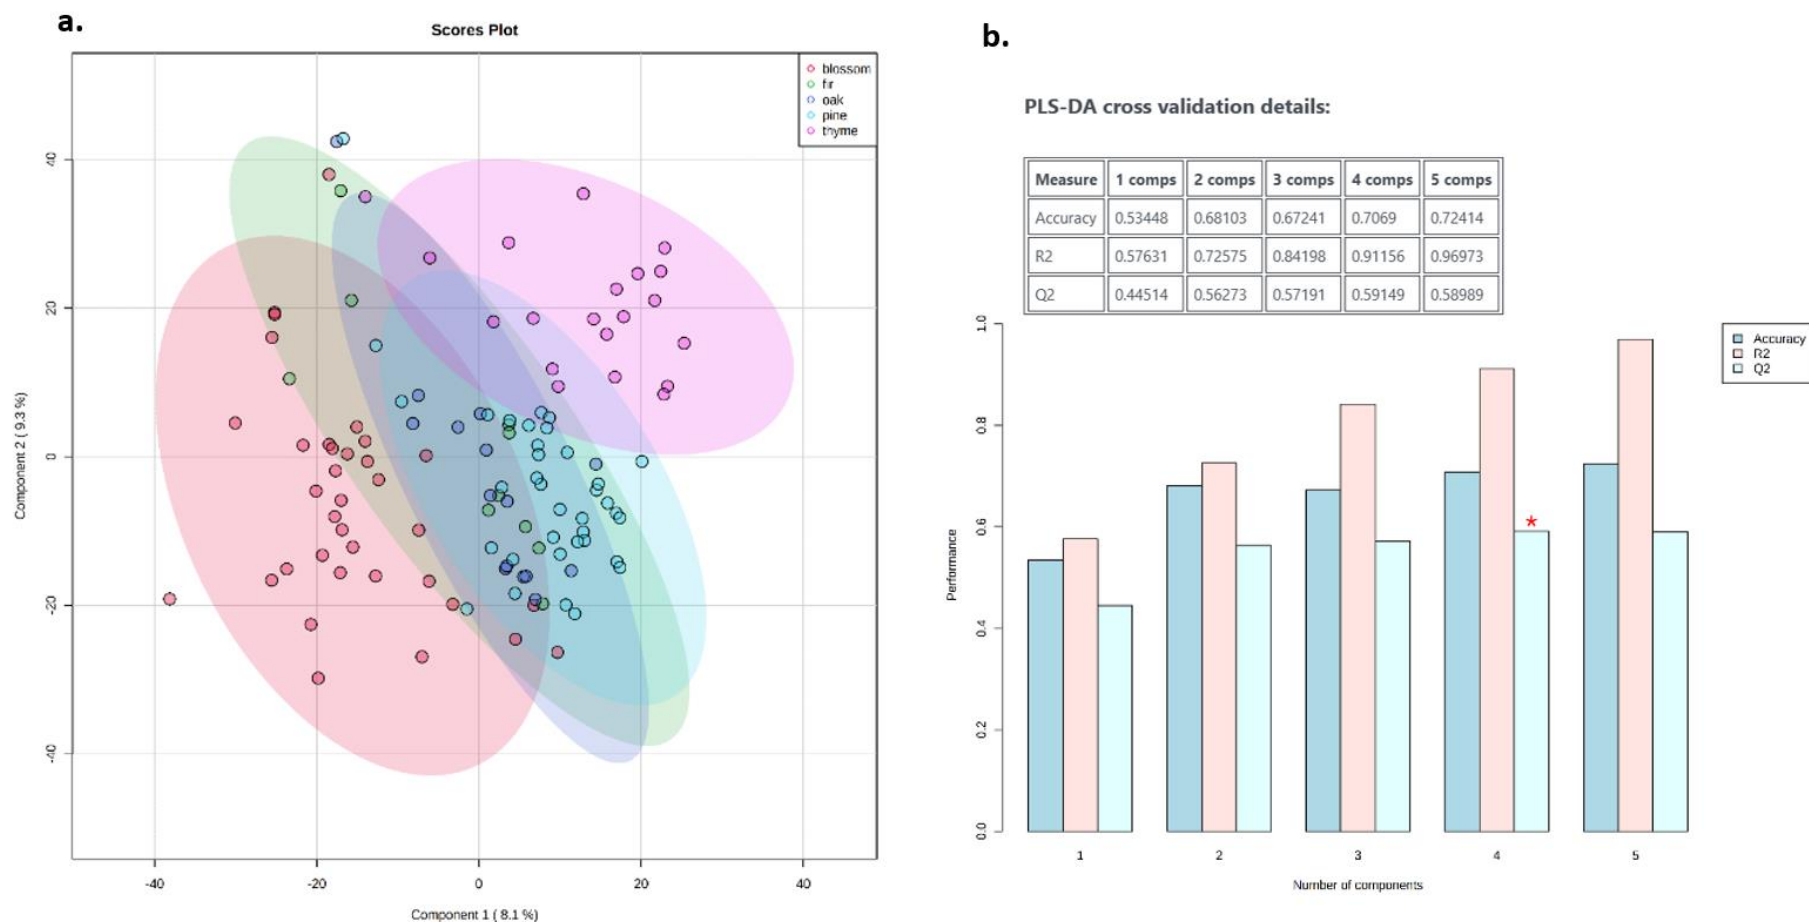

**Figure S6.** a) The developed PLS-DA model for the 5 different honey classes. b) The effect of the number of parameters in the accuracy,  $R^2$  and  $Q^2$  of the model.



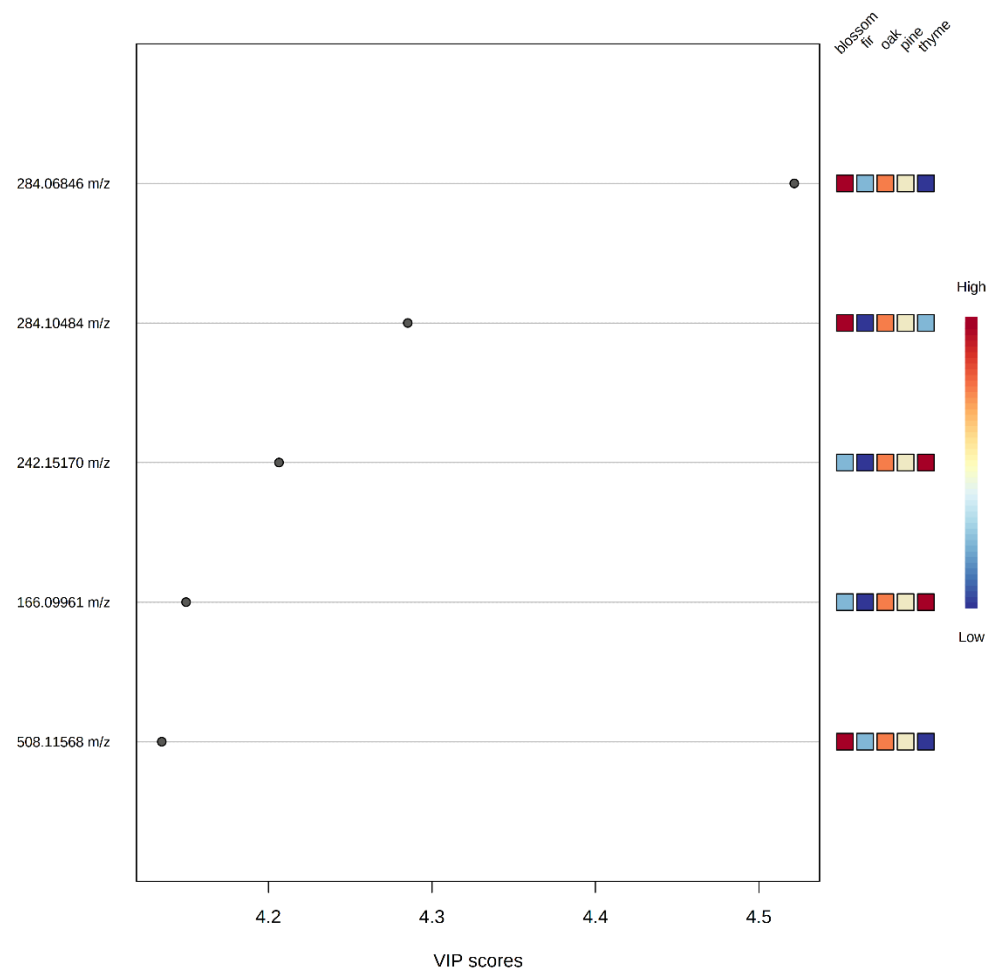

**Figure S7.** VIP scores on the importance of the monitored mass features for the PLS-DA model containing the 5 honey classes.

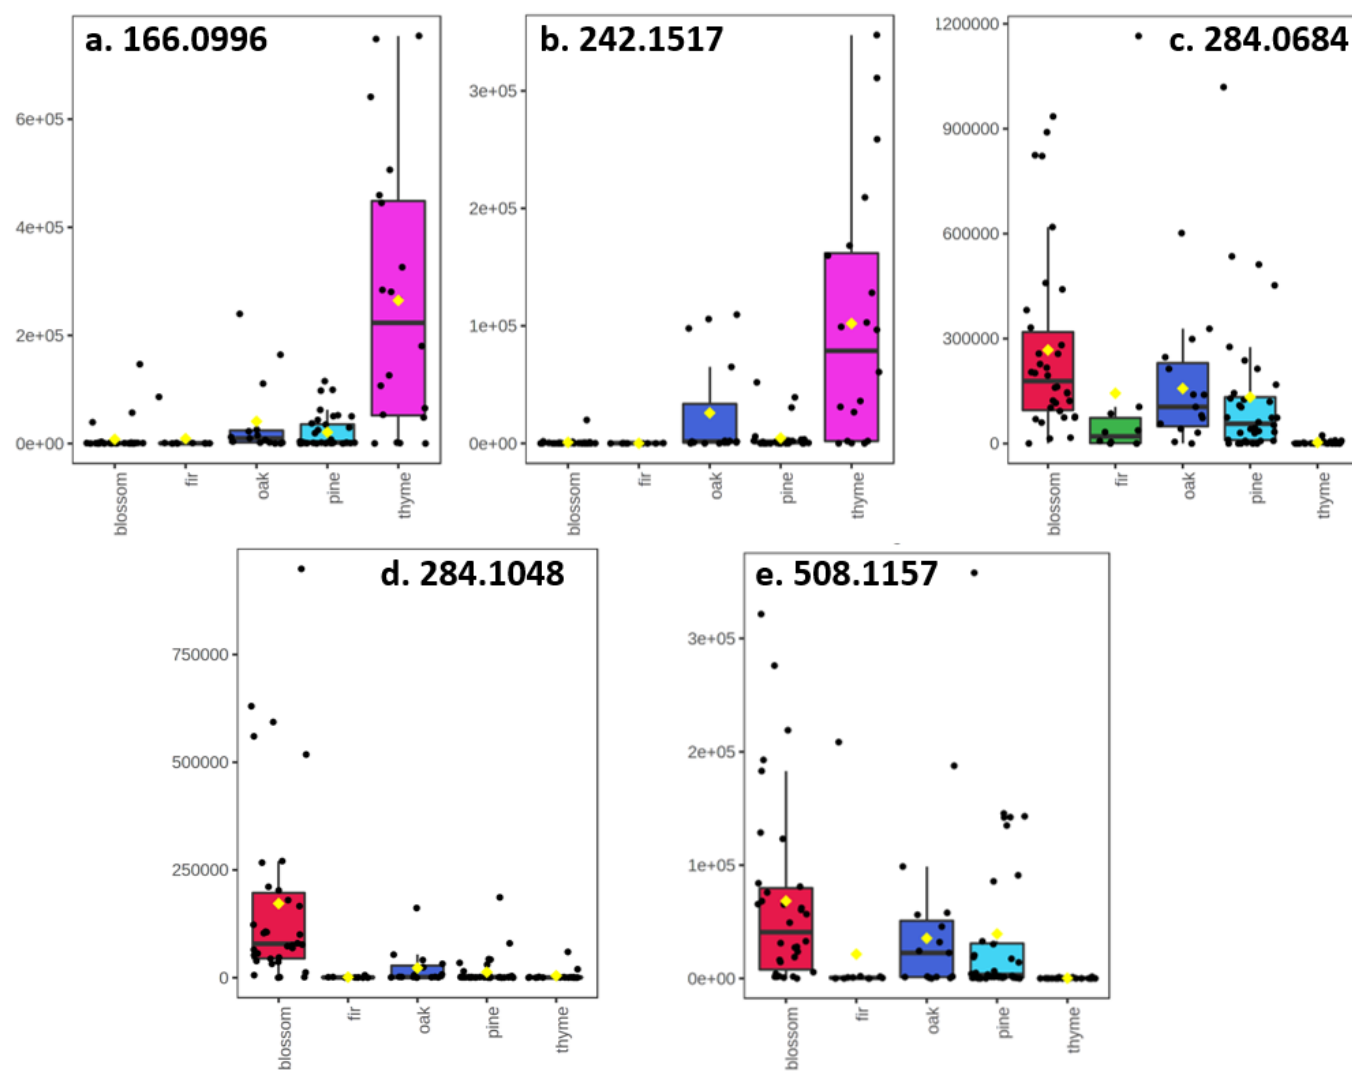

**Figure S8.** Box plots (Fig. S8a-e) for the 5 VIP mass features for the PLS-DA model containing the 5 honey classes.

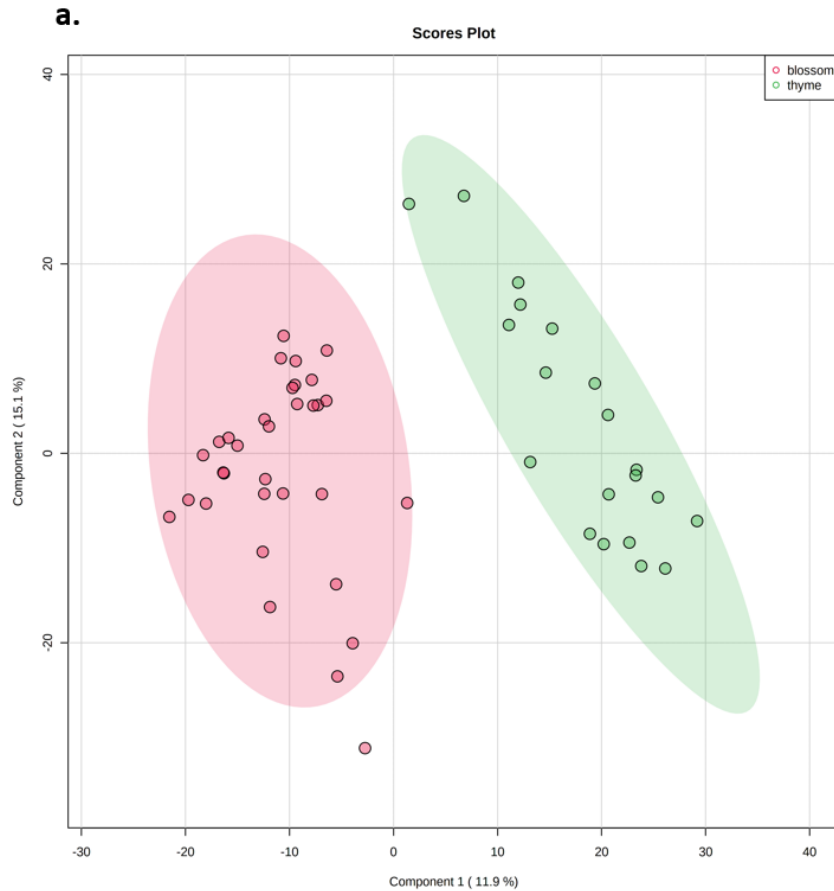

**b.**

PLS-DA cross validation details:

| Measure  | 1 comps | 2 comps | 3 comps | 4 comps | 5 comps |
|----------|---------|---------|---------|---------|---------|
| Accuracy | 0.96667 | 0.98    | 0.98    | 0.98    | 0.98    |
| R2       | 0.85246 | 0.89819 | 0.96436 | 0.99164 | 0.99598 |
| Q2       | 0.77721 | 0.81428 | 0.81692 | 0.82762 | 0.83618 |

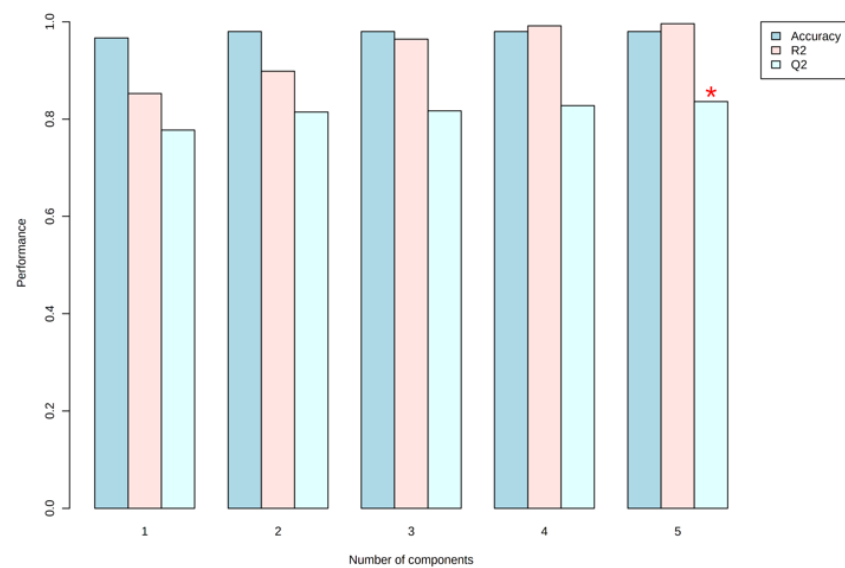

**Figure S9.** a) The developed PLS-DA model for the binary model “blossom vs. thyme”. b) The effect of the number of parameters in the accuracy,  $R^2$  and  $Q^2$  of the model.

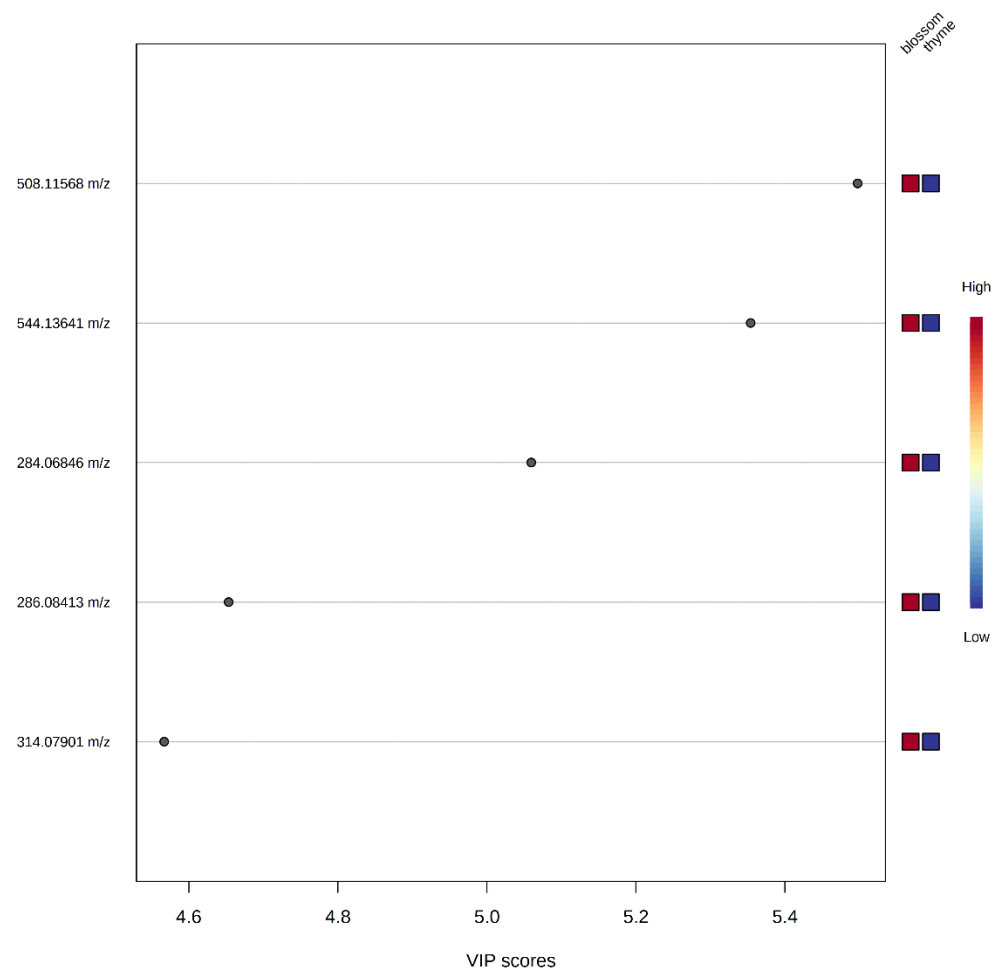

**Figure S10.** VIP scores on the importance of the monitored mass features for the binary PLS-DA model “blossom vs. thyme”.

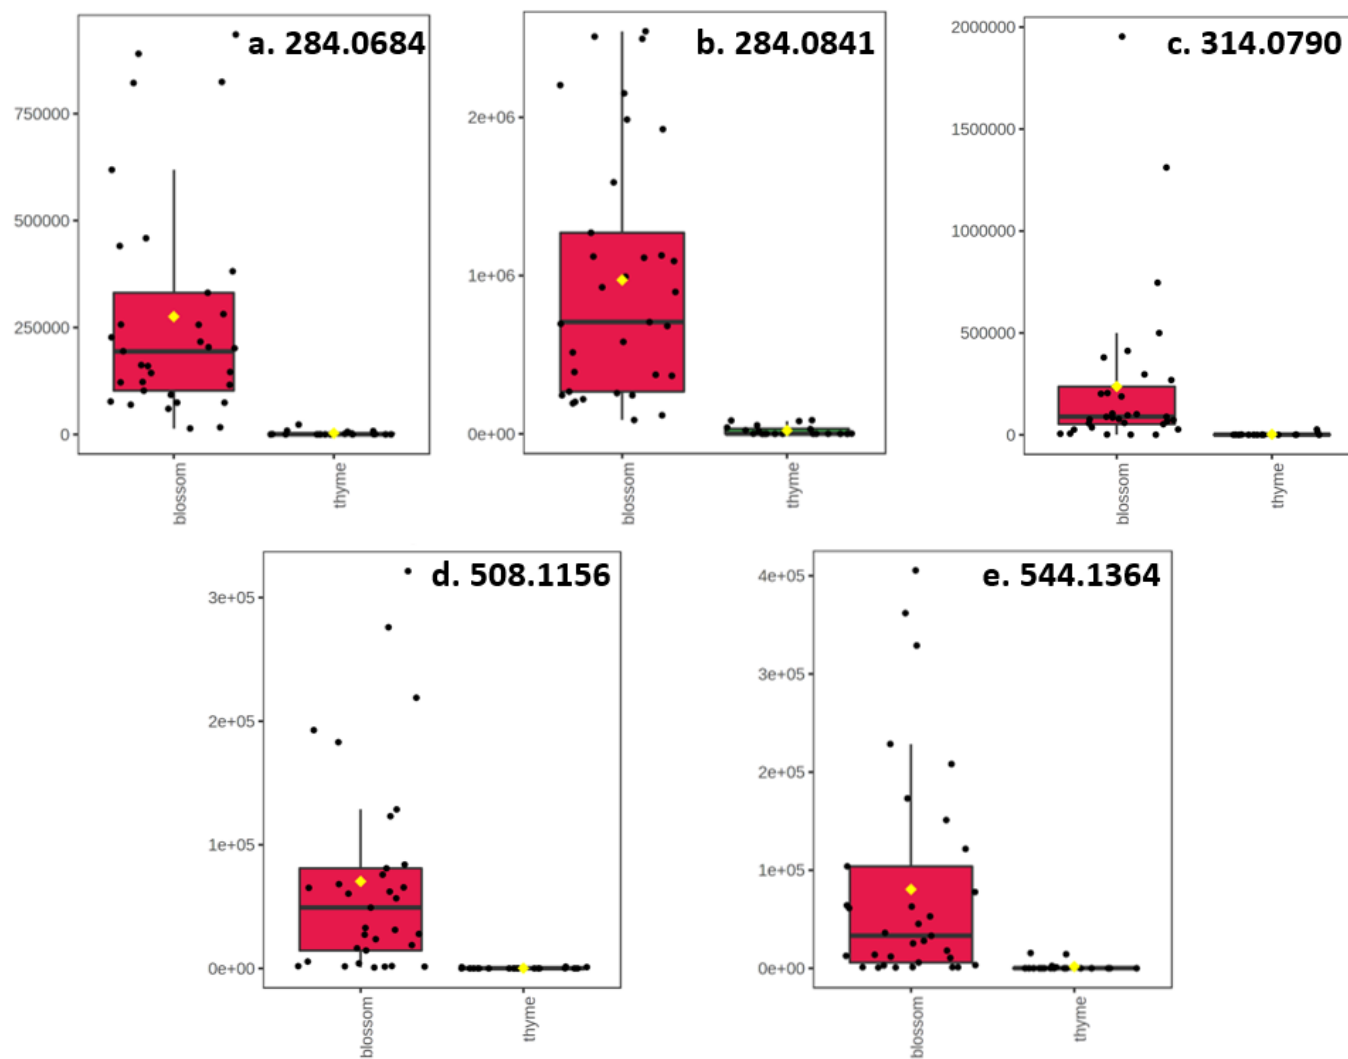

**Figure S11.** Box plots (Fig. S11a-e) for the 5 VIP mass features for the binary PLS-DA model “blossom vs. thyme”.

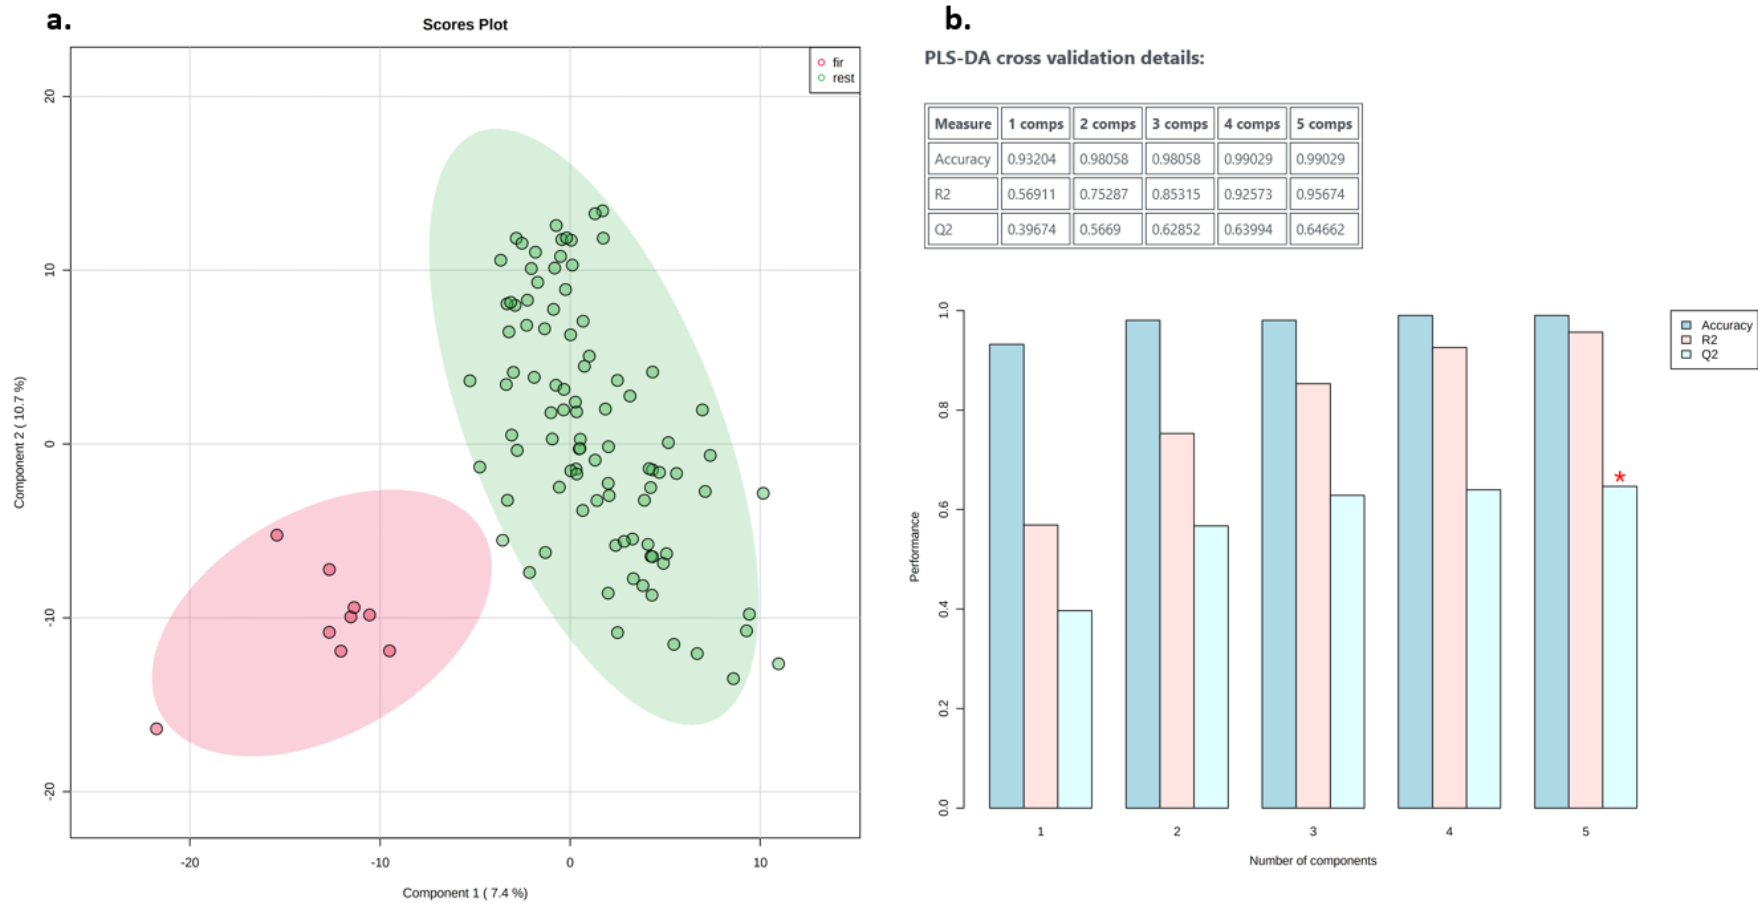

**Figure S12.** a) The developed PLS-DA model for the binary model “fir vs. rest classes”. b) The effect of the number of parameters in the accuracy,  $R^2$  and  $Q^2$  of the model.

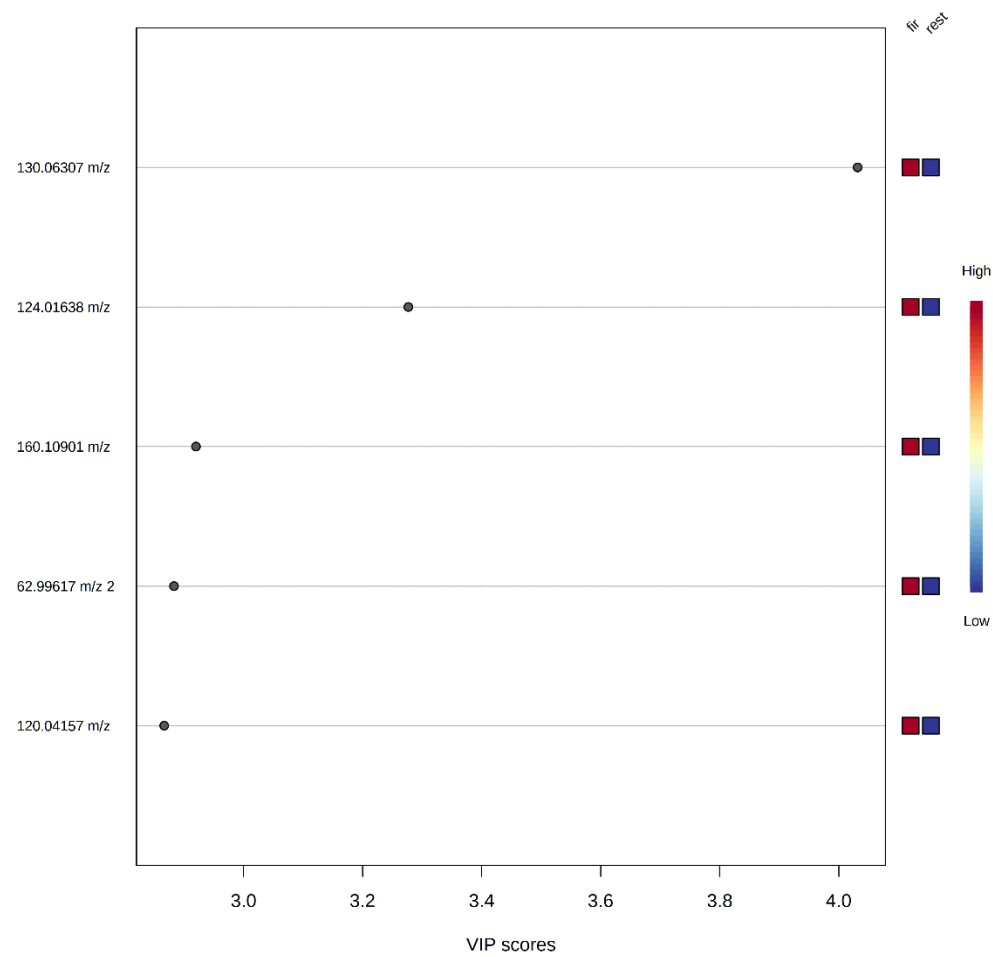

**Figure S13.** VIP scores on the importance of the monitored mass features for the binary PLS-DA model “fir vs. rest classes”.

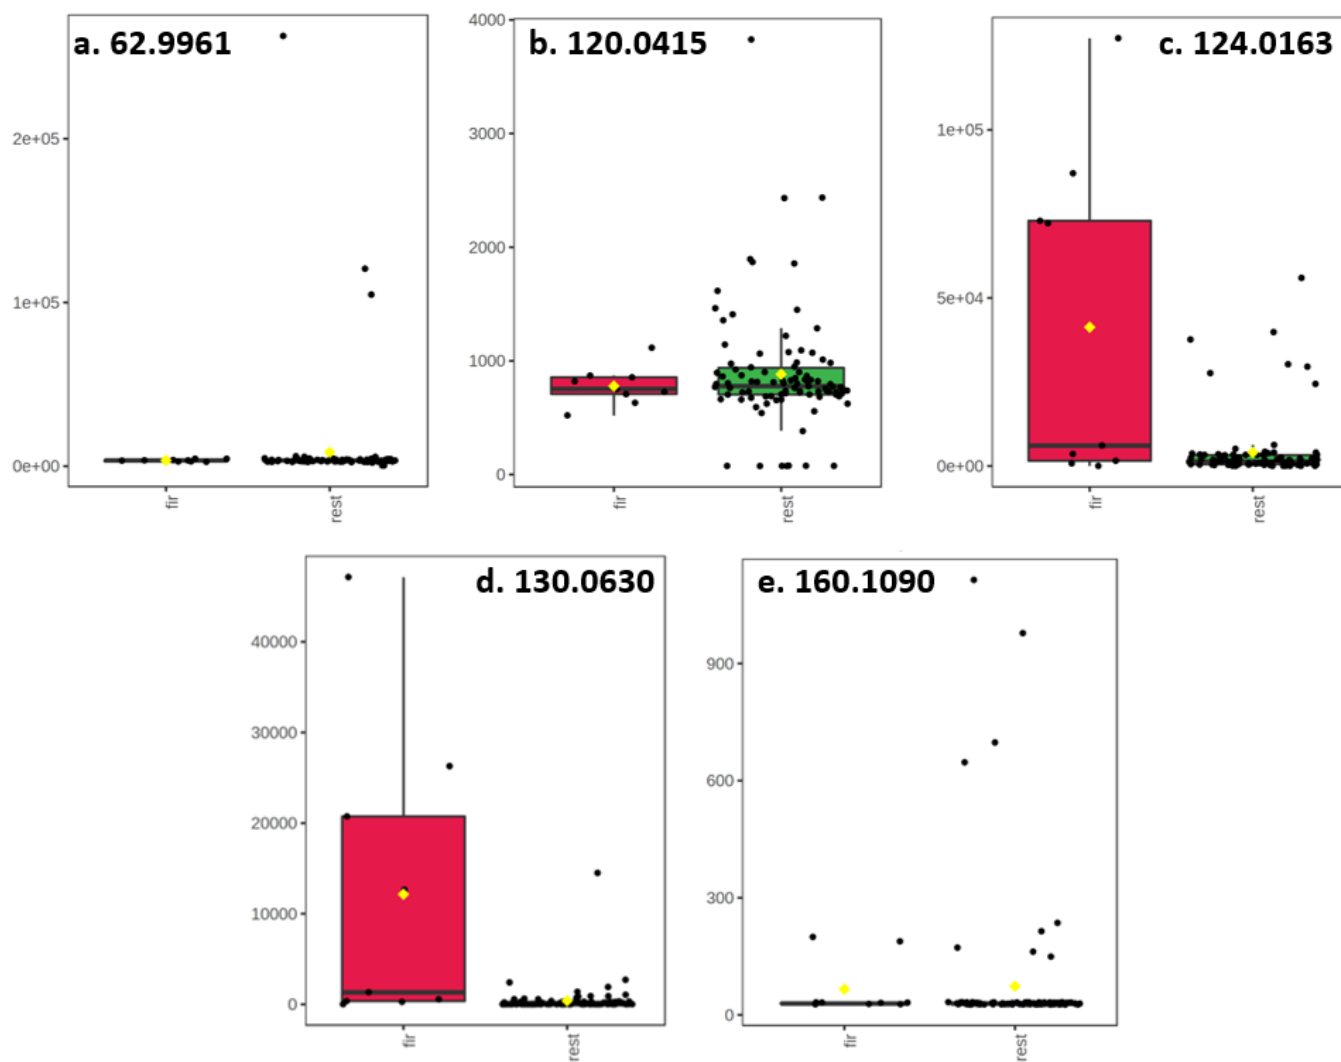

**Figure S14.** Box plots (Fig. S14a-e) for the 5 VIP mass features for the binary PLS-DA model "fir vs. rest classes".



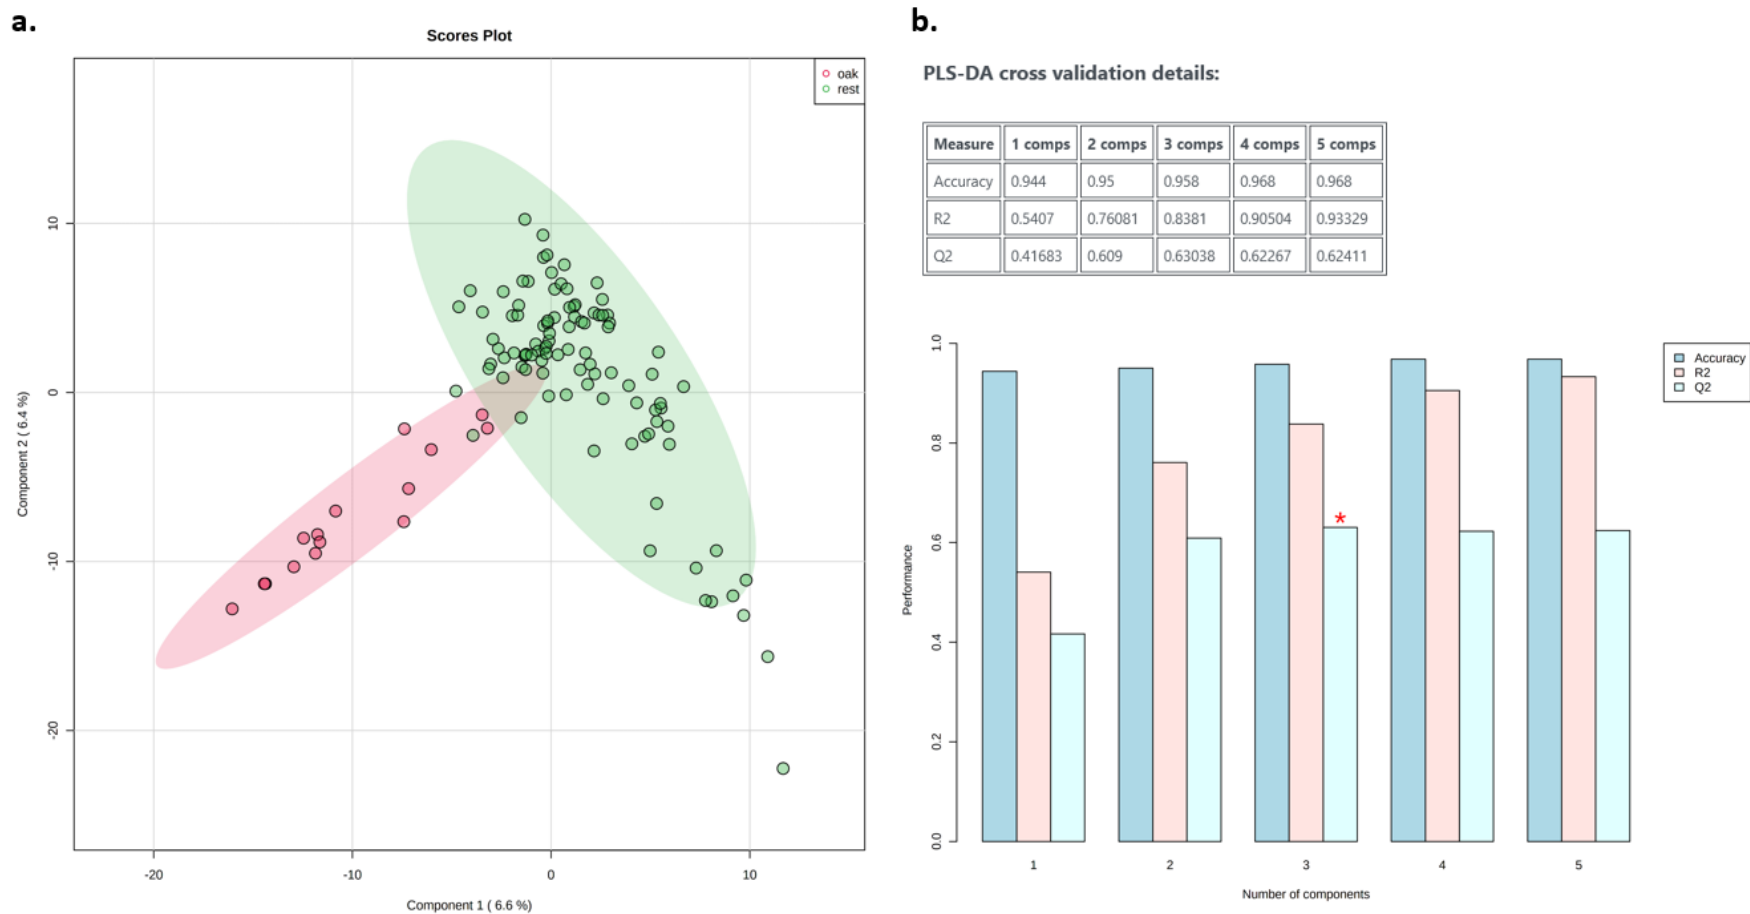

**Figure S15.** a) The developed PLS-DA model for the binary model “oak vs. rest classes”. b) The effect of the number of parameters in the accuracy,  $R^2$  and  $Q^2$  of the model.

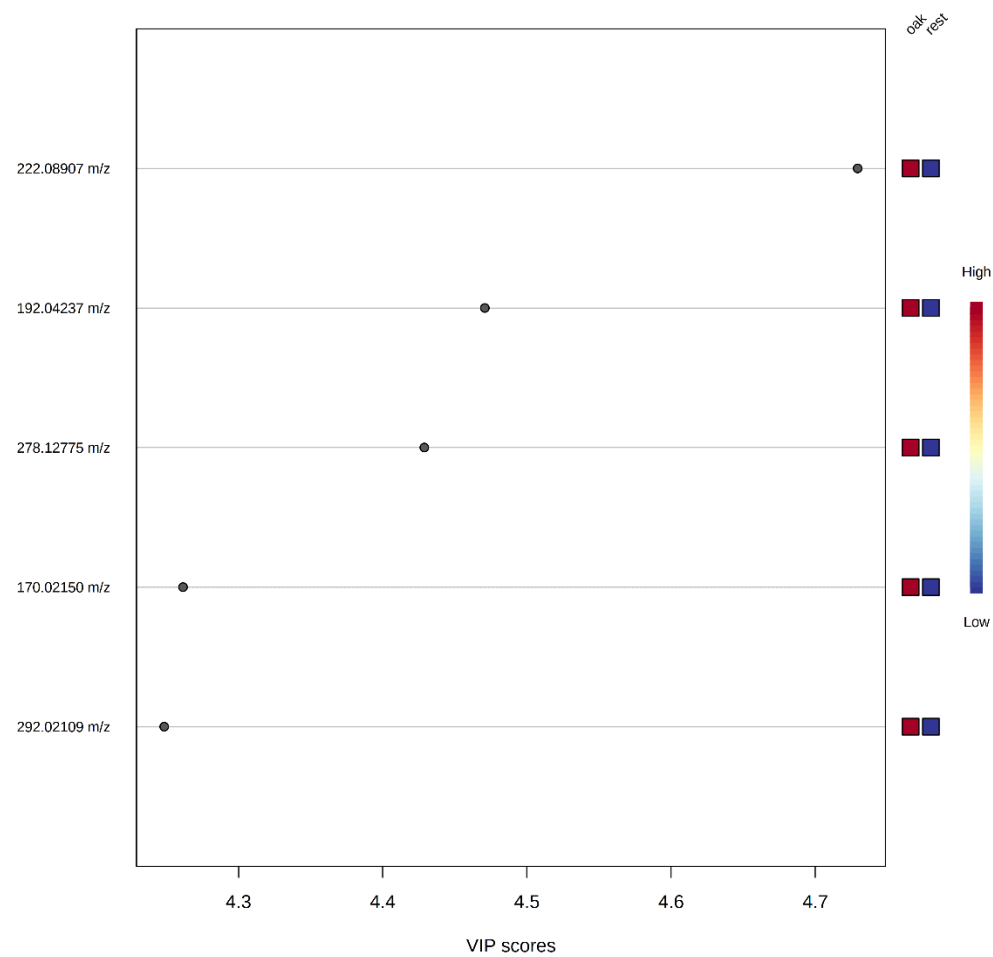

**Figure S16.** VIP scores on the importance of the monitored mass features for the binary PLS-DA model “fir vs. rest classes”.

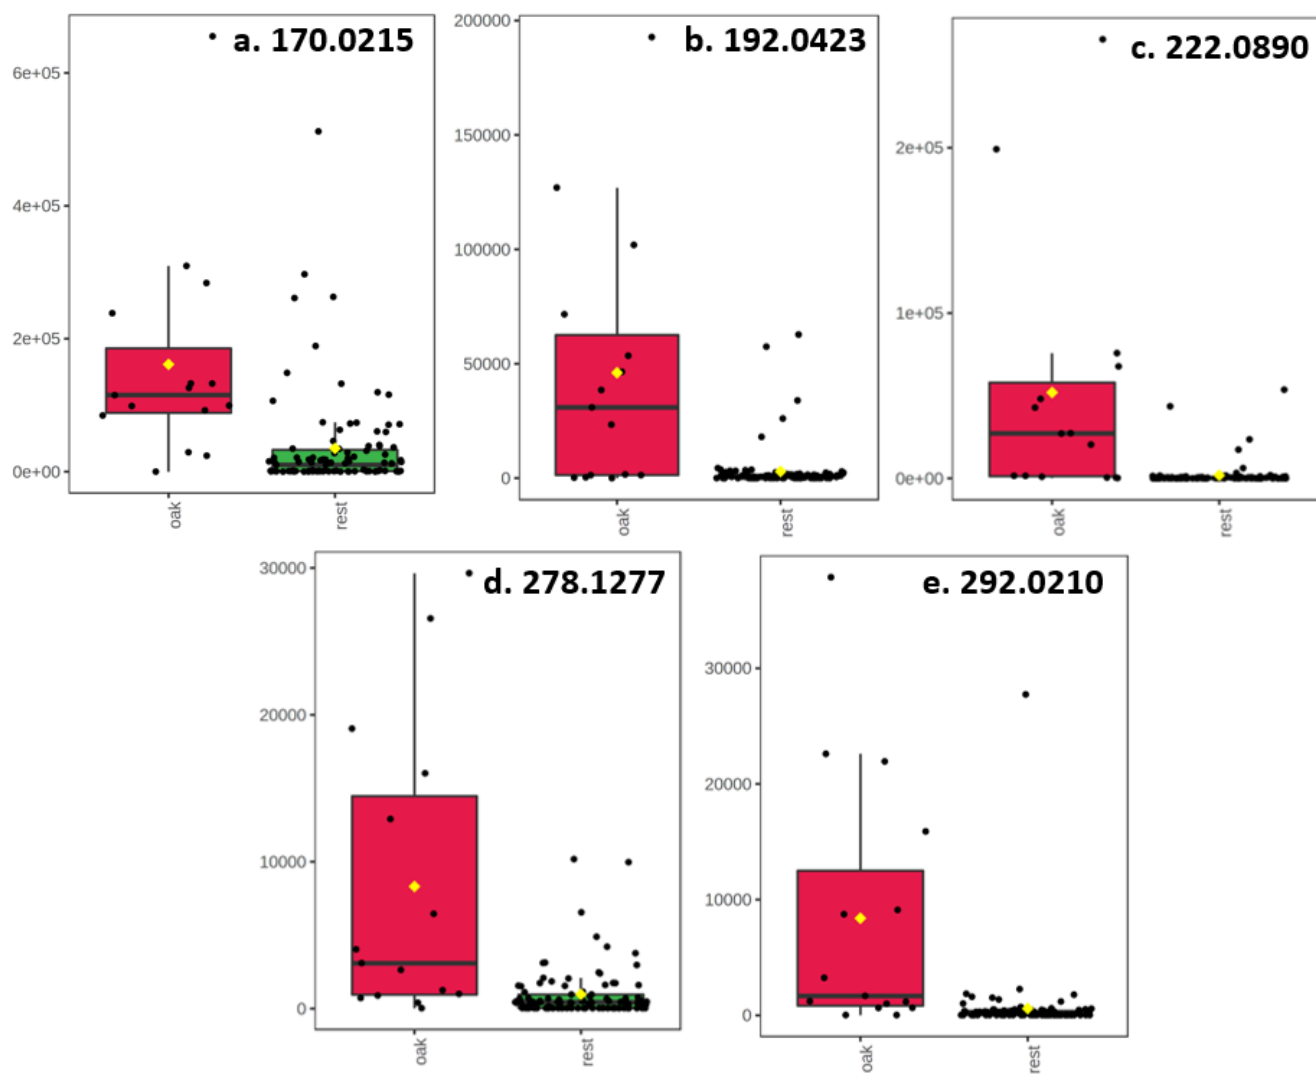

**Figure S17.** Box plots (Fig. S17a-e) for the 5 VIP mass features for the binary PLS-DA model "oak vs. rest classes".

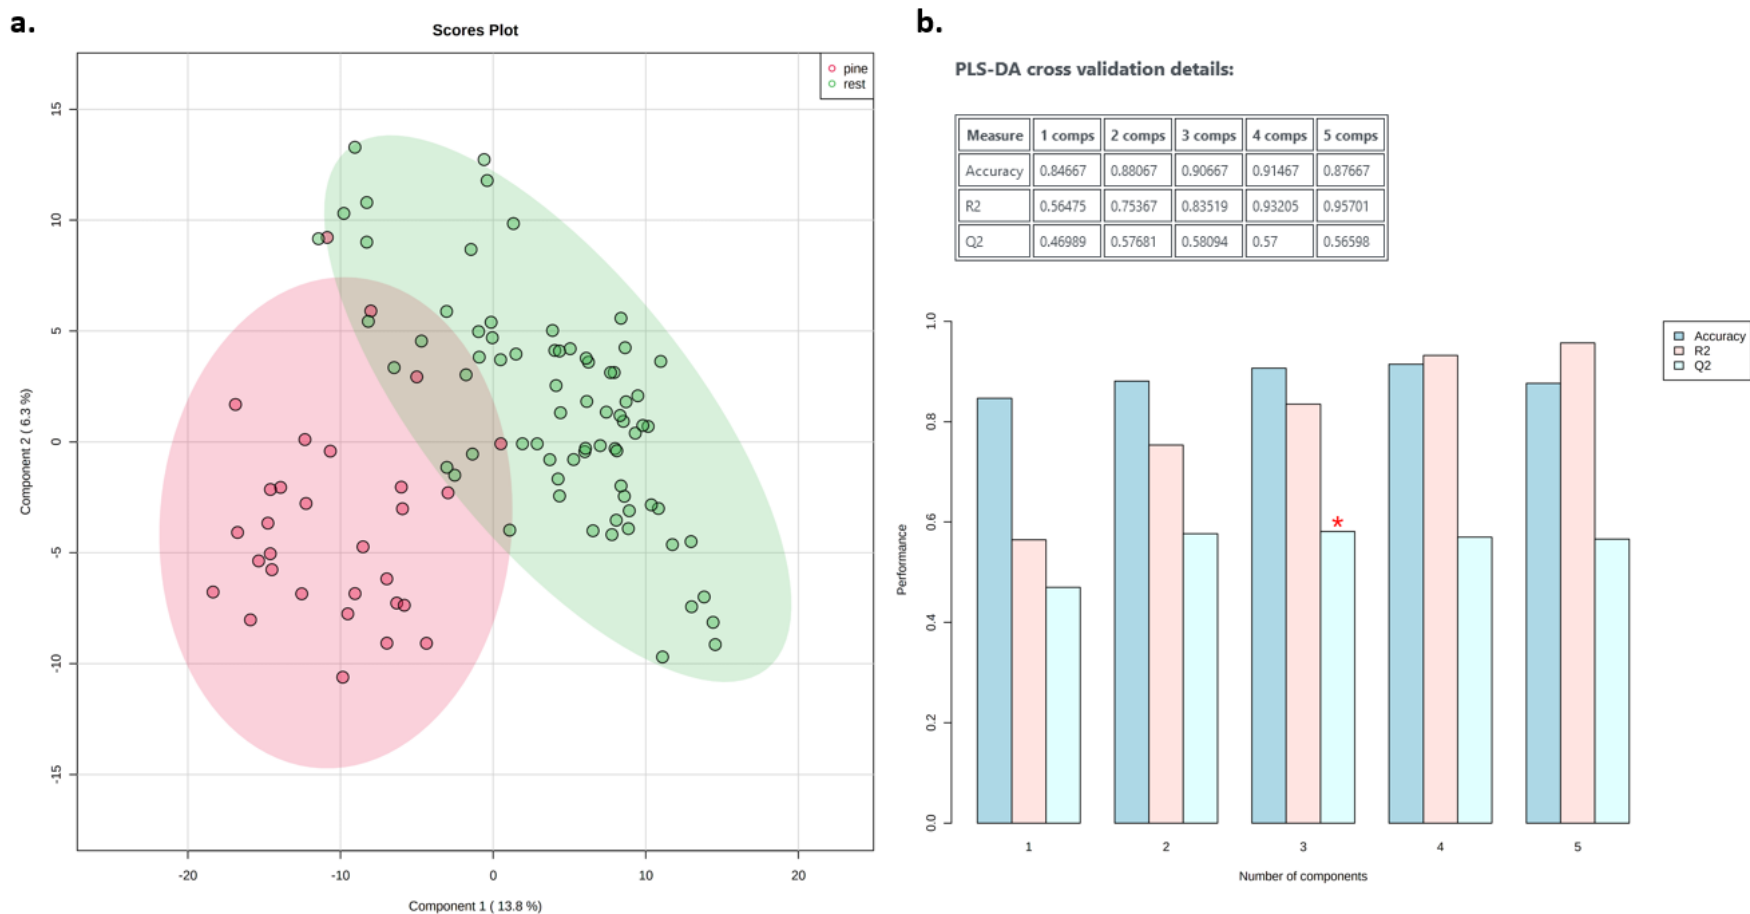

**Figure S18.** a) The developed PLS-DA model for the binary model “pine vs. rest classes”. b) The effect of the number of parameters in the accuracy,  $R^2$  and  $Q^2$  of the model.

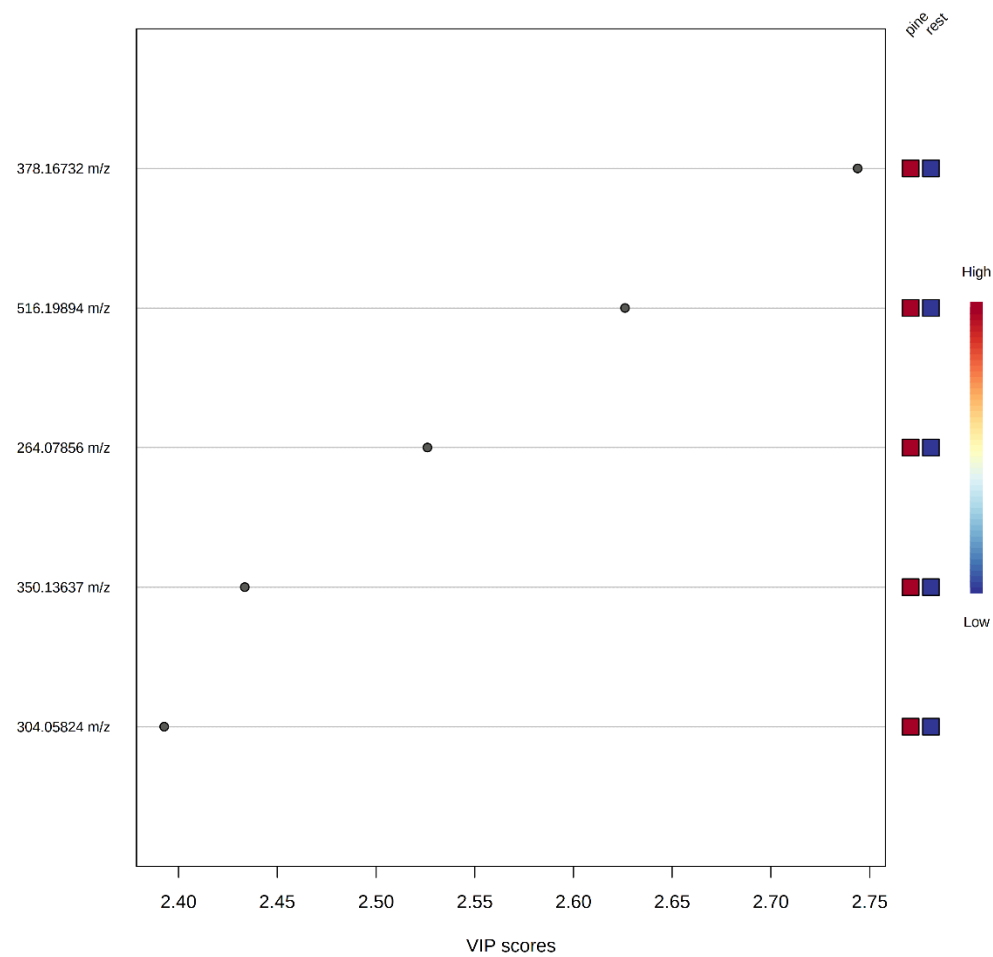

**Figure S19.** VIP scores on the importance of the monitored mass features for the binary PLS-DA model “pine vs. rest classes”.

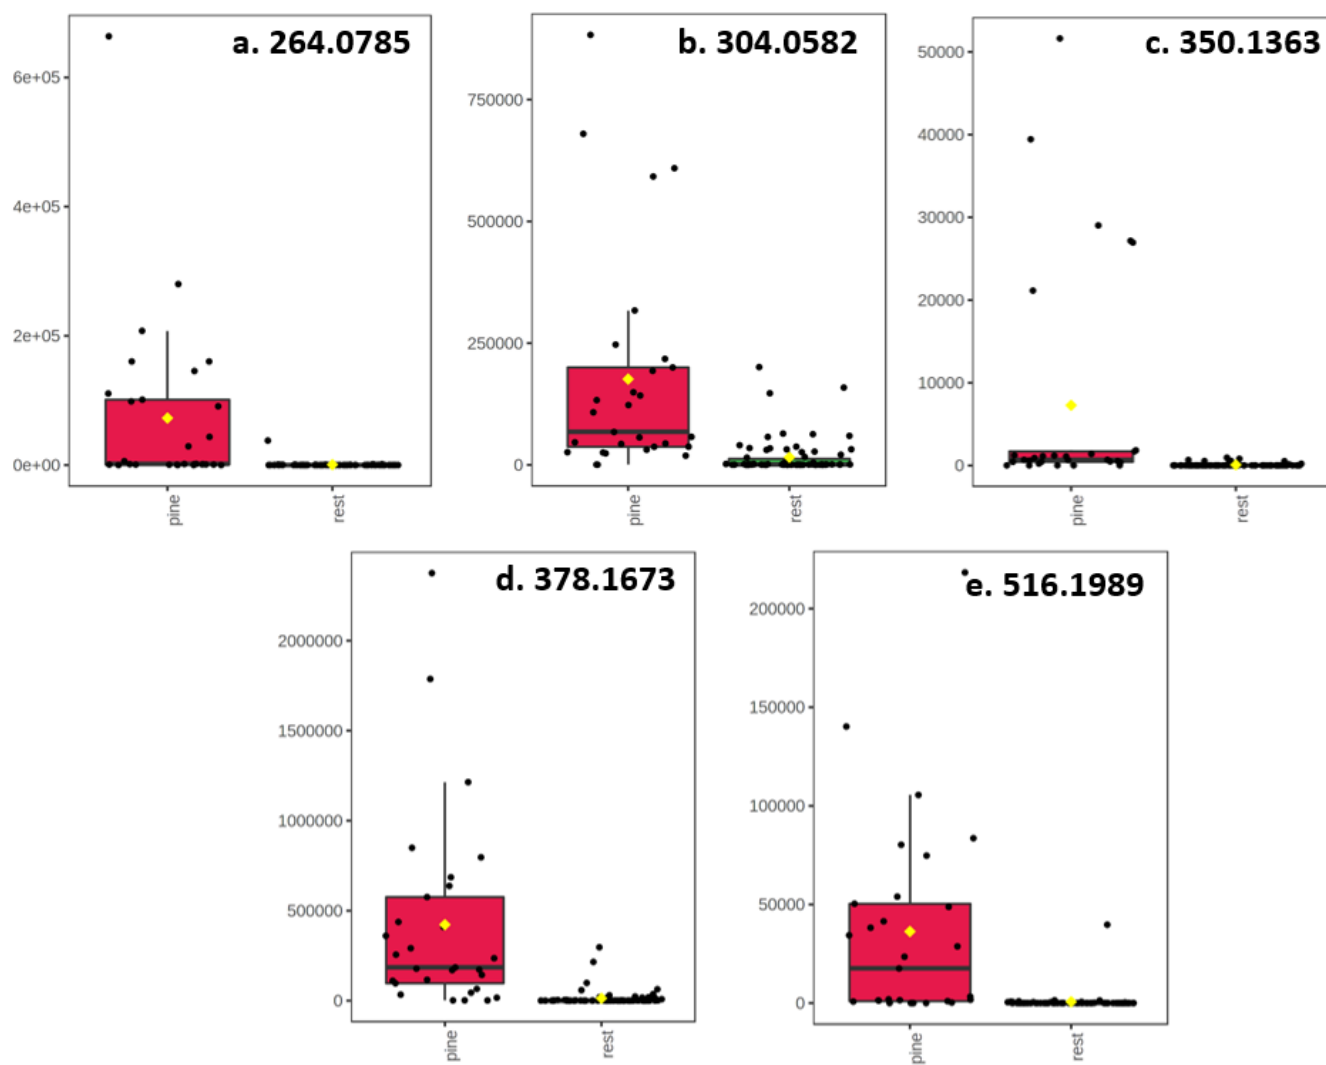

**Figure S20.** Box plots (Fig. S20a-e) for the 5 VIP mass features for the binary PLS-DA model “pine vs. rest classes”.

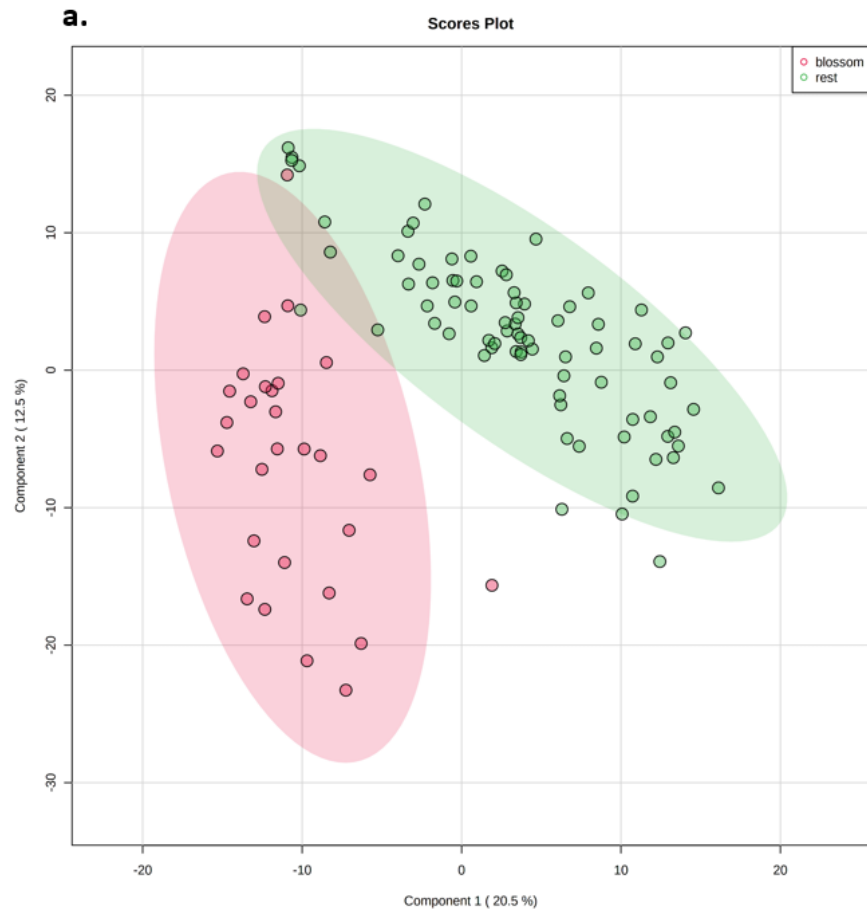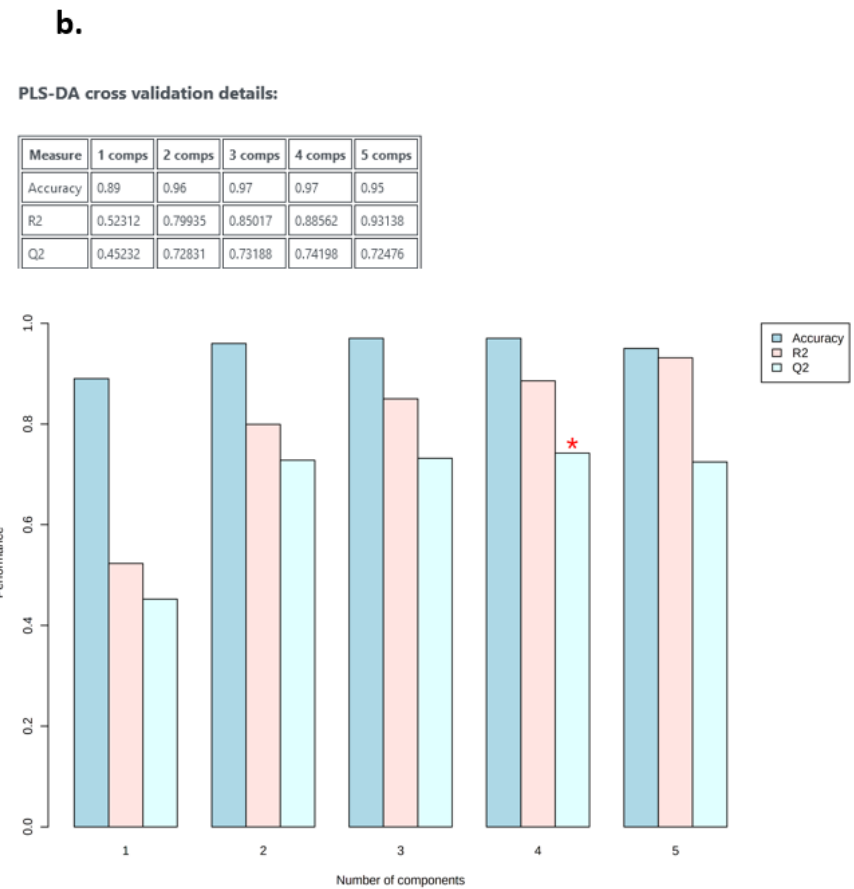

**Figure S21.** a) The developed PLS-DA model for the binary model “blossom vs. rest classes”. b) The effect of the number of parameters in the accuracy, R<sup>2</sup> and Q<sup>2</sup> of the model.

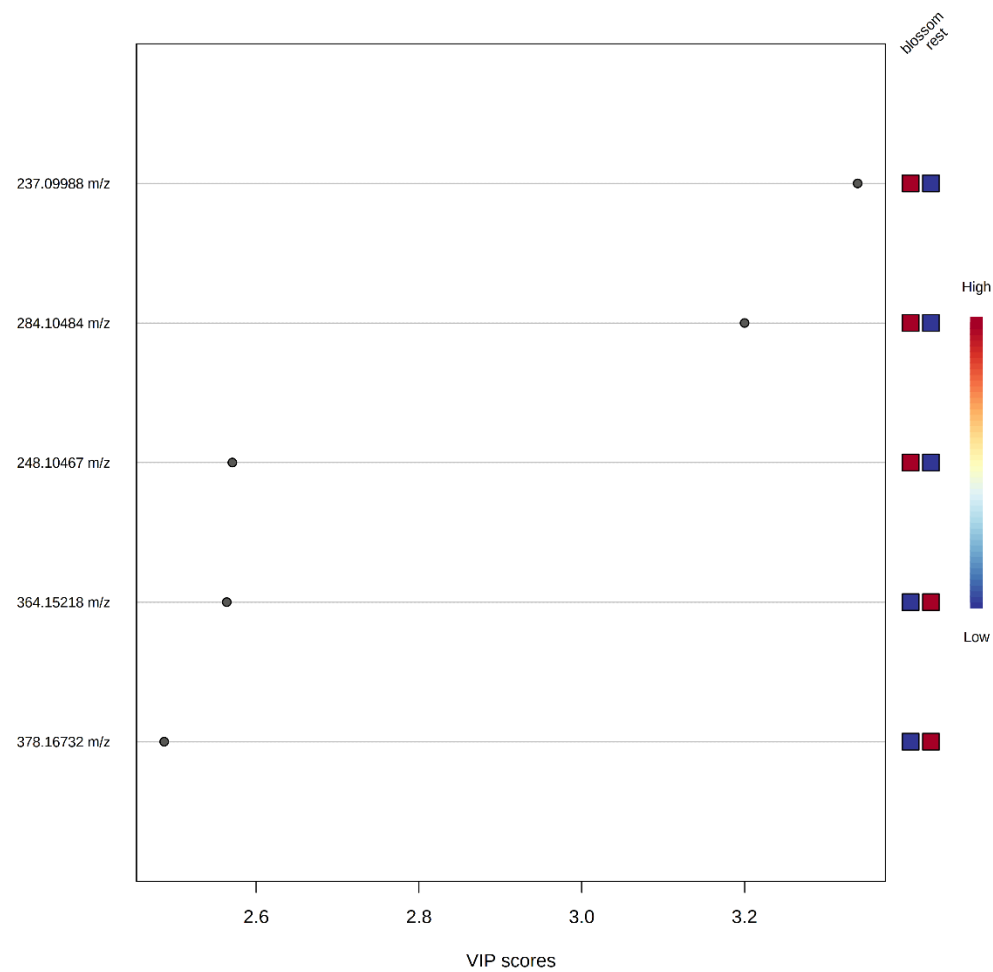

**Figure S22.** VIP scores on the importance of the monitored mass features for the binary PLS-DA model “blossom vs. rest classes”.



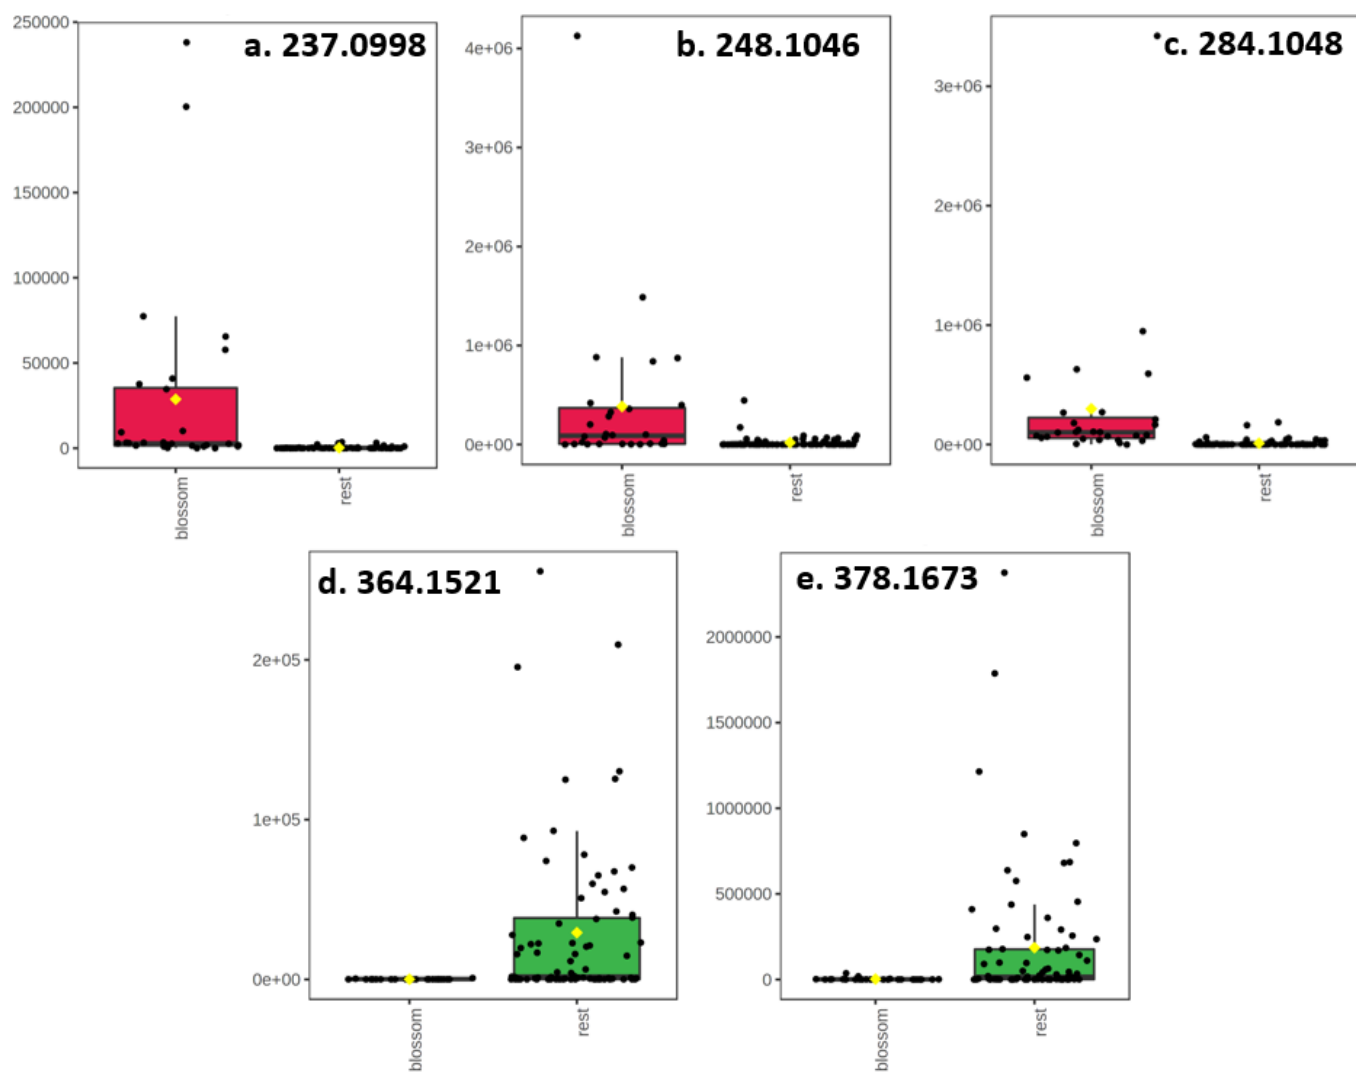

**Figure S23.** Box plots (Fig. S23a-e) for the 5 VIP mass features for the binary PLS-DA model “blossom vs. rest classes”.

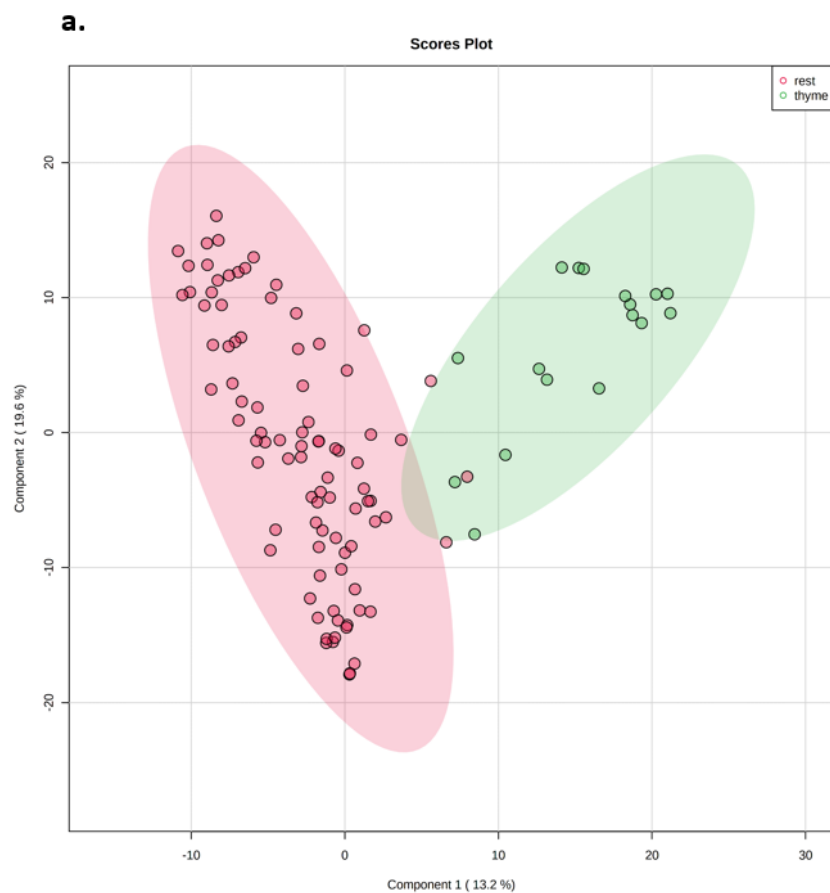

**b.**

PLS-DA cross validation details:

| Measure        | 1 comps | 2 comps | 3 comps | 4 comps | 5 comps |
|----------------|---------|---------|---------|---------|---------|
| Accuracy       | 0.972   | 0.972   | 0.982   | 0.982   | 0.99    |
| R <sup>2</sup> | 0.71866 | 0.80882 | 0.8784  | 0.93209 | 0.96361 |
| Q <sup>2</sup> | 0.66029 | 0.75568 | 0.80527 | 0.81871 | 0.82468 |

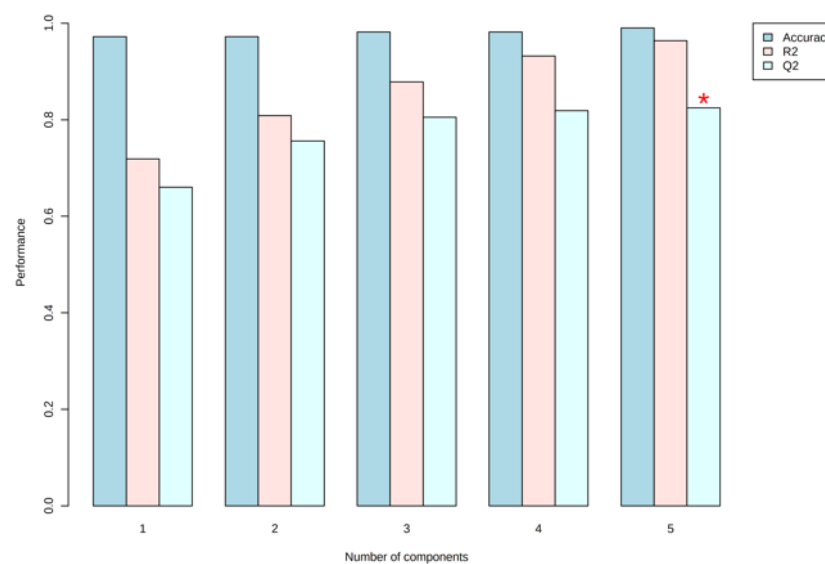

**Figure S24.** a) The developed PLS-DA model for the binary model “thyme vs. rest classes”. b) The effect of the number of parameters in the accuracy,  $R^2$  and  $Q^2$  of the model.

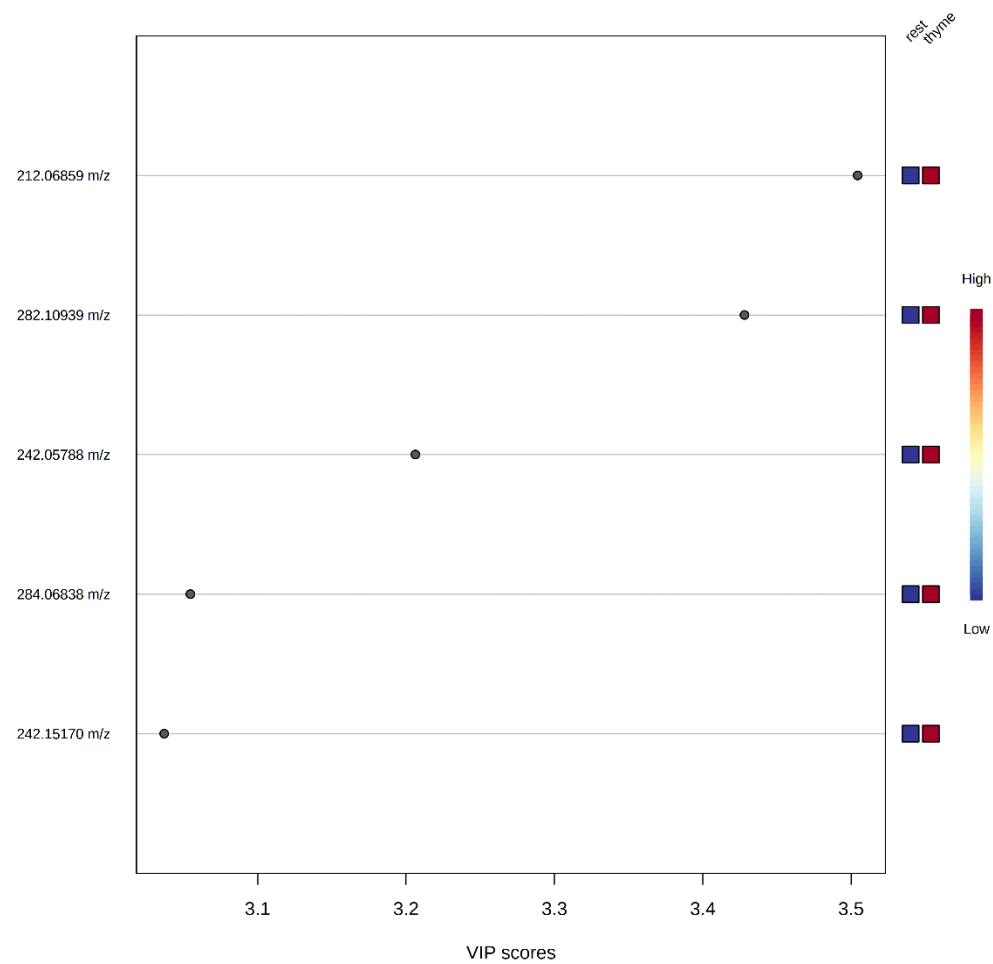

**Figure S25.** VIP scores on the importance of the monitored mass features for the binary PLS-DA model “thyme vs. rest classes”.

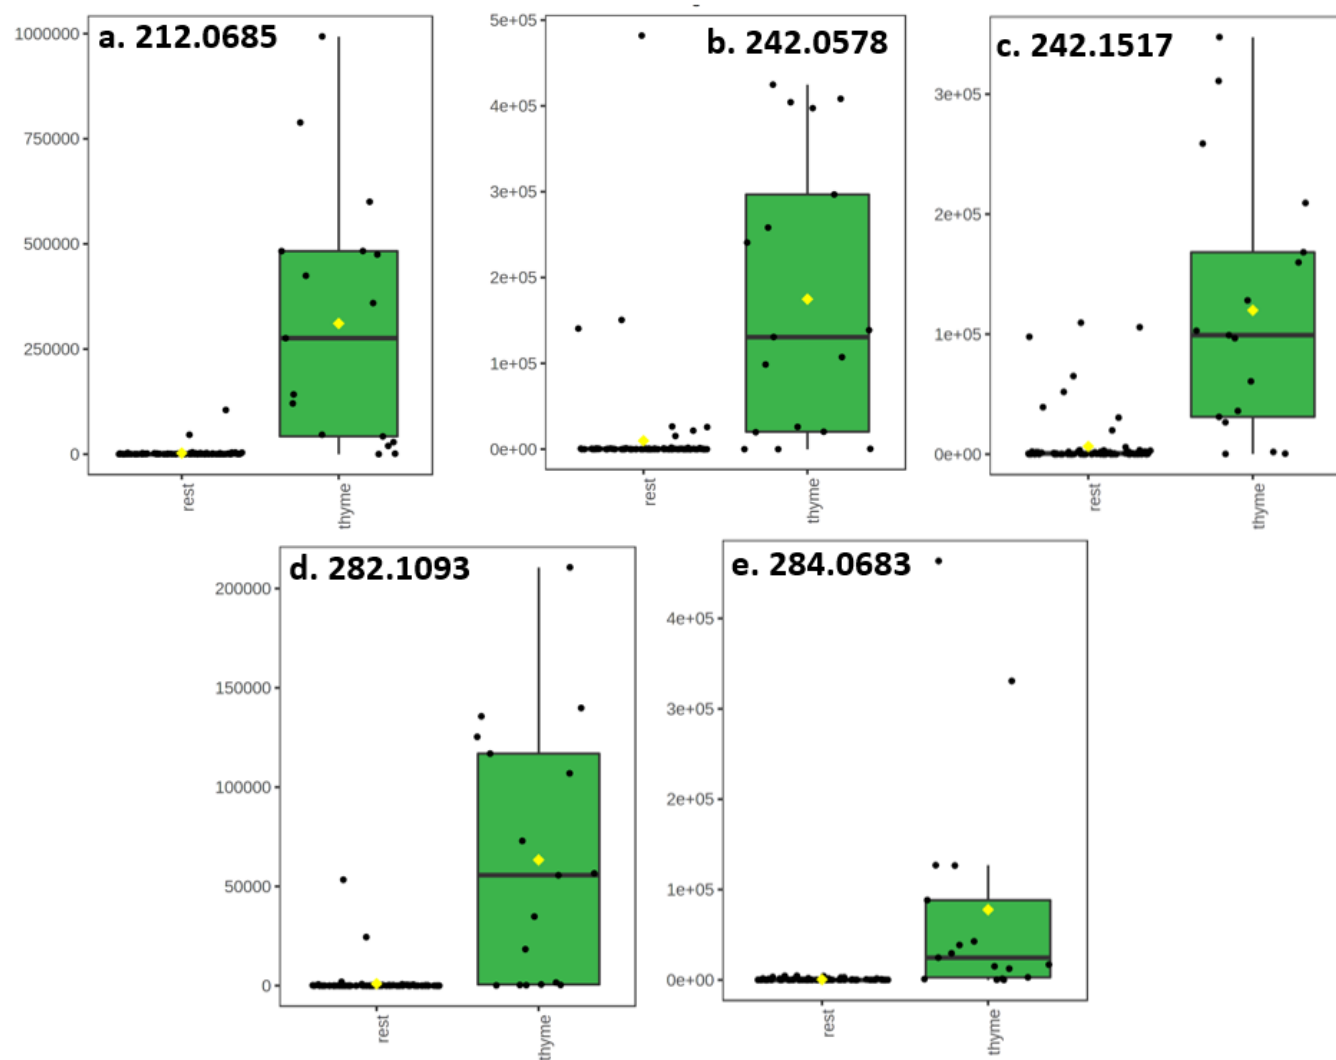

**Figure S26.** Box plots (Fig. S26a-e) for the 5 VIP mass features for the binary PLS-DA model "thyme vs. rest classes".

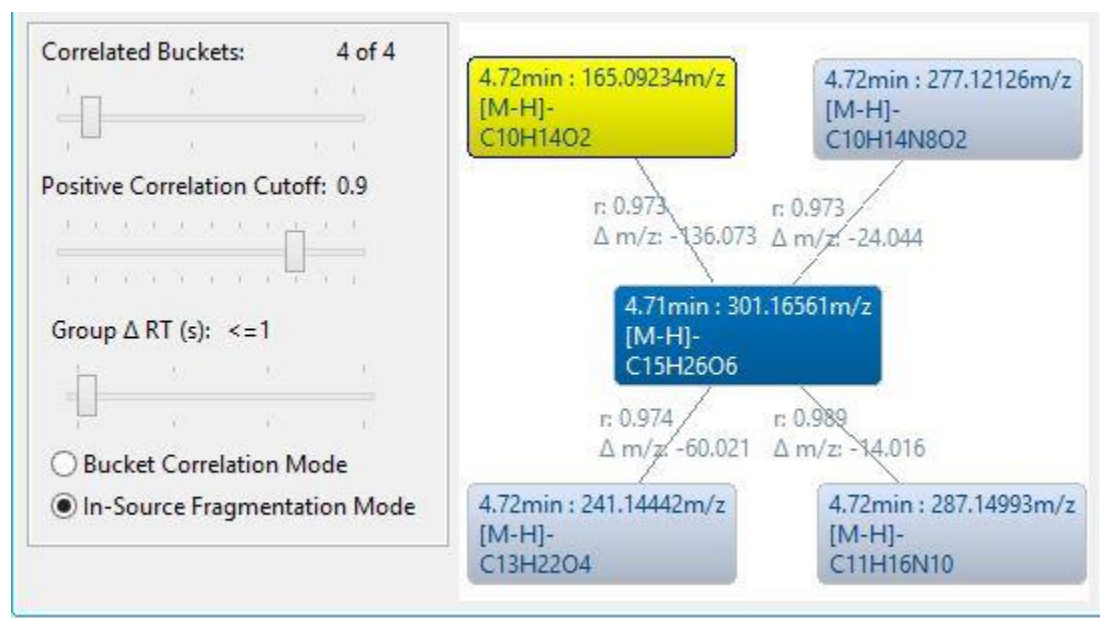

**Figure S27.** In-source fragments of m/z 301.1656 as proposed by Metaboscape 3.0

## Sample list

**Table S2.** Tested honey sample list

| <b>ID</b> | <b>Type</b> | <b>Region</b> | <b>Year</b> |
|-----------|-------------|---------------|-------------|
| B1        | blossom     | Evros         | 2016        |
| B2        | blossom     | Evros         | 2016        |
| B3        | blossom     | Evros         | 2016        |
| B4        | blossom     | Evros         | 2016        |
| B5        | blossom     | Evros         | 2016        |
| B6        | blossom     | Evros         | 2016        |
| B7        | blossom     | Evros         | 2016        |
| B8        | blossom     | Evros         | 2016        |
| B9        | blossom     | Evros         | 2016        |
| B10       | blossom     | Macedonia     | 2016        |
| B11       | blossom     | Macedonia     | 2016        |
| B12       | blossom     | Macedonia     | 2016        |
| B13       | blossom     | Macedonia     | 2016        |
| B14       | blossom     | Macedonia     | 2016        |
| B15       | blossom     | Macedonia     | 2016        |
| B16       | blossom     | Macedonia     | 2016        |
| B17       | blossom     | Macedonia     | 2016        |
| B18       | blossom     | Macedonia     | 2016        |
| B19       | blossom     | Macedonia     | 2016        |
| B20       | blossom     | Macedonia     | 2016        |
| B21       | blossom     | Macedonia     | 2016        |
| B22       | blossom     | Macedonia     | 2016        |
| B23       | blossom     | Macedonia     | 2016        |
| B24       | blossom     | Macedonia     | 2016        |
| B25       | blossom     | Macedonia     | 2016        |
| B26       | blossom     | Macedonia     | 2016        |
| B27       | blossom     | Macedonia     | 2016        |
| B28       | blossom     | Macedonia     | 2016        |
| B29       | blossom     | Macedonia     | 2016        |
| B30       | blossom     | Macedonia     | 2016        |
| B31       | blossom     | Macedonia     | 2016        |
| B32       | blossom     | Macedonia     | 2016        |

|       |         |           |      |
|-------|---------|-----------|------|
| B33   | blossom | Macedonia | 2016 |
| B34   | blossom | Macedonia | 2016 |
| B35   | blossom | Macedonia | 2016 |
| B36   | blossom | Evros     | 2017 |
| B37   | blossom | Evros     | 2017 |
| B38   | blossom | Evros     | 2017 |
| B39   | blossom | Evros     | 2017 |
| B40   | blossom | Evros     | 2017 |
| B41   | blossom | Evros     | 2017 |
| B42   | blossom | Evros     | 2017 |
| B43   | blossom | Evros     | 2017 |
| B44   | blossom | Evros     | 2017 |
| B45   | blossom | Evros     | 2017 |
| B46   | blossom | Evros     | 2017 |
| B47   | blossom | Evros     | 2017 |
| B48   | blossom | Evros     | 2017 |
| B49   | blossom | Evros     | 2017 |
| B50   | blossom | Evros     | 2017 |
| B51   | blossom | Evros     | 2017 |
| B52   | blossom | Evros     | 2017 |
| B53   | blossom | Evros     | 2017 |
| B54   | blossom | Macedonia | 2017 |
| B55   | blossom | Macedonia | 2017 |
| B56   | blossom | Macedonia | 2017 |
| B57   | blossom | Macedonia | 2017 |
| B58   | blossom | Macedonia | 2017 |
| B59   | blossom | Macedonia | 2017 |
| B60   | blossom | Macedonia | 2017 |
| B61   | blossom | Macedonia | 2017 |
| B62   | blossom | Macedonia | 2017 |
| <hr/> |         |           |      |
| O1    | oak     | n.a.      | 2016 |
| O2    | oak     | n.a.      | 2016 |
| O3    | oak     | n.a.      | 2016 |
| O4    | oak     | n.a.      | 2016 |
| O5    | oak     | n.a.      | 2016 |
| O6    | oak     | n.a.      | 2016 |

|       |      |           |      |
|-------|------|-----------|------|
| O7    | oak  | n.a.      | 2016 |
| O8    | oak  | n.a.      | 2016 |
| O9    | oak  | n.a.      | 2016 |
| O10   | oak  | n.a.      | 2016 |
| O11   | oak  | n.a.      | 2016 |
| O12   | oak  | n.a.      | 2016 |
| O13   | oak  | n.a.      | 2016 |
| O14   | oak  | n.a.      | 2016 |
| O15   | oak  | n.a.      | 2016 |
| O16   | oak  | n.a.      | 2017 |
| O17   | oak  | n.a.      | 2017 |
| O18   | oak  | n.a.      | 2017 |
| O19   | oak  | n.a.      | 2017 |
| O20   | oak  | n.a.      | 2017 |
| O21   | oak  | n.a.      | 2017 |
| O22   | oak  | n.a.      | 2017 |
| O23   | oak  | n.a.      | 2017 |
| O24   | oak  | n.a.      | 2017 |
| <hr/> |      |           |      |
| F1    | fir  | Karpenisi | 2016 |
| F2    | fir  | Karpenisi | 2016 |
| F3    | fir  | Karpenisi | 2016 |
| F4    | fir  | Karpenisi | 2016 |
| F5    | fir  | Karpenisi | 2016 |
| F6    | fir  | Karpenisi | 2016 |
| F7    | fir  | Karpenisi | 2016 |
| F8    | fir  | Karpenisi | 2016 |
| F9    | fir  | Karpenisi | 2016 |
| F10   | fir  | Karpenisi | 2016 |
| <hr/> |      |           |      |
| P1    | pine | Macedonia | 2016 |
| P2    | pine | Macedonia | 2016 |
| P3    | pine | Macedonia | 2016 |
| P4    | pine | Macedonia | 2016 |
| P5    | pine | Thasos    | 2016 |
| P6    | pine | Thasos    | 2016 |
| P7    | pine | Thasos    | 2016 |
| P8    | pine | Thasos    | 2016 |



|     |       |            |      |
|-----|-------|------------|------|
| P9  | pine  | Thasos     | 2016 |
| P10 | pine  | Thasos     | 2016 |
| P11 | pine  | Nikiti     | 2016 |
| P12 | pine  | Nikiti     | 2016 |
| P13 | pine  | Nikiti     | 2016 |
| P14 | pine  | Nikiti     | 2016 |
| P15 | pine  | Nikiti     | 2016 |
| P16 | pine  | Nikiti     | 2016 |
| P17 | pine  | Nikiti     | 2016 |
| P18 | pine  | Nikiti     | 2016 |
| P19 | pine  | Nikiti     | 2016 |
| P20 | pine  | Chalkidiki | 2016 |
| P21 | pine  | Chalkidiki | 2016 |
| P22 | pine  | Chalkidiki | 2016 |
| P23 | pine  | Chalkidiki | 2016 |
| P24 | pine  | Chalkidiki | 2016 |
| P25 | pine  | Chalkidiki | 2016 |
| P26 | pine  | Chalkidiki | 2016 |
| P27 | pine  | Evia       | 2016 |
| P28 | pine  | Evia       | 2016 |
| P29 | pine  | Evia       | 2016 |
| P30 | pine  | Evia       | 2016 |
| P31 | pine  | Evia       | 2016 |
| P32 | pine  | Evia       | 2016 |
| P33 | pine  | Evia       | 2016 |
| P34 | pine  | Evia       | 2016 |
| P35 | pine  | Evia       | 2016 |
| P36 | pine  | Evia       | 2016 |
| P37 | pine  | Macedonia  | 2017 |
| P38 | pine  | Macedonia  | 2017 |
| P39 | pine  | Macedonia  | 2017 |
| T1  | thyme | Chania     | 2016 |
| T2  | thyme | Chania     | 2016 |
| T3  | thyme | Chania     | 2016 |
| T4  | thyme | Chania     | 2016 |
| T5  | thyme | Chania     | 2016 |

|     |       |               |      |
|-----|-------|---------------|------|
| T6  | thyme | Chania        | 2016 |
| T7  | thyme | Heraklion     | 2016 |
| T8  | thyme | Heraklion     | 2016 |
| T9  | thyme | Heraklion     | 2016 |
| T10 | thyme | Heraklion     | 2016 |
| T11 | thyme | Heraklion     | 2016 |
| T12 | thyme | Heraklion     | 2016 |
| T13 | thyme | Rethymno      | 2016 |
| T14 | thyme | Almyros Volos | 2016 |
| T15 | thyme | Almyros Volos | 2016 |
| T16 | thyme | Astypalaia    | 2016 |
| T17 | thyme | Astypalaia    | 2016 |
| T18 | thyme | Skyros        | 2016 |
| T19 | thyme | Heraklion     | 2017 |
| T20 | thyme | Chania        | 2017 |
| T21 | thyme | Heraklion     | 2017 |
| T22 | thyme | Chania        | 2017 |
| T23 | thyme | Heraklion     | 2017 |
| T24 | thyme | Heraklion     | 2017 |
| T25 | thyme | Heraklion     | 2017 |
| T26 | thyme | Heraklion     | 2017 |
| T27 | thyme | Chania        | 2017 |
| T28 | thyme | Chania        | 2017 |
| T29 | thyme | Rethymno      | 2017 |
| T30 | thyme | Rethymno      | 2017 |
| T31 | thyme | Rethymno      | 2017 |
| T32 | thyme | Heraklion     | 2017 |
| T33 | thyme | Heraklion     | 2017 |
| T34 | thyme | Heraklion     | 2017 |

---

## Method verification results

**Table S3.** Verification results for the targeted analytes

| Compound                  | Repeatability<br>%RSDr (n=6) | Intermediate<br>precision %RSDR<br>(n=18) | LOD<br>(mg kg <sup>-1</sup> ) | LOQ<br>(mg kg <sup>-1</sup> ) | R <sup>2</sup> |
|---------------------------|------------------------------|-------------------------------------------|-------------------------------|-------------------------------|----------------|
| 2,5 dihydroxybenzoic acid | 5.0                          | 7.5                                       | 0.072                         | 0.21                          | 0.993          |
| 3,4 dihydroxybenzoic acid | 2.8                          | 4.3                                       | 0.083                         | 0.25                          | 0.990          |
| 4 hydroxybenzoic acid     | 3.3                          | 8.2                                       | 0.098                         | 0.23                          | 0.980          |
| apigenin                  | 1.8                          | 5.6                                       | 0.082                         | 0.24                          | 0.990          |
| caffeic acid              | 6.2                          | 8.3                                       | 0.065                         | 0.19                          | 0.994          |
| chrysin                   | 3.2                          | 7.1                                       | 0.032                         | 0.097                         | 0.999          |
| cinnamic acid             | 5.4                          | 4.6                                       | 0.043                         | 0.13                          | 0.997          |
| eriodictyol               | 3.4                          | 9.6                                       | 0.048                         | 0.14                          | 0.997          |
| ferulic acid              | 3.2                          | 6.6                                       | 0.030                         | 0.091                         | 0.999          |
| galangin                  | 3.8                          | 6.9                                       | 0.071                         | 0.21                          | 0.993          |
| gallic acid               | 2.2                          | 9.4                                       | 0.067                         | 0.20                          | 0.994          |
| genistein                 | 0.7                          | 8.1                                       | 0.081                         | 0.24                          | 0.991          |
| luteolin                  | 11                           | 8.7                                       | 0.079                         | 0.24                          | 0.991          |
| naringenin                | 3.7                          | 11                                        | 0.045                         | 0.15                          | 0.997          |
| p-coumaric acid           | 1.5                          | 7.8                                       | 0.16                          | 0.49                          | 0.960          |
| pinobanksin               | 3.8                          | 11                                        | 0.055                         | 0.16                          | 0.996          |
| pinocembrin               | 6.9                          | 7.9                                       | 0.076                         | 0.23                          | 0.992          |
| quercetin                 | 4.5                          | 19                                        | 0.067                         | 0.19                          | 0.993          |
| rosmarinic acid           | 4.5                          | 9.7                                       | 0.084                         | 0.25                          | 0.990          |
| salicylic acid            | 8.9                          | 8.8                                       | 0.33                          | 0.99                          | 0.984          |
| syringic acid             | 4.8                          | 8.5                                       | 0.081                         | 0.24                          | 0.991          |
| taxifolin                 | 2.0                          | 6.7                                       | 0.084                         | 0.25                          | 0.990          |
| vanillic acid             | 3.8                          | 4.4                                       | 0.12                          | 0.36                          | 0.980          |
| vanillin                  | 3.3                          | 7.7                                       | 0.037                         | 0.11                          | 0.998          |

Method trueness

**Table S4.** Attained trueness in terms of recovery (R%) per honey matrix.

| Analytes                  | Sample ID | RECOVERIES (%) |     |     |      |       |
|---------------------------|-----------|----------------|-----|-----|------|-------|
|                           |           | Blossom        | Fir | Oak | Pine | Thyme |
| 2,5 dihydroxybeznoic acid |           | 55             | 57  | 94  | 84   | 108   |
| 3,4 dihydroxybenzoic acid |           | 83             | 70  | 74  | 71   | 109   |
| 4 hydroxybenzoic acid     |           | 69             | 87  | 68  | 104  | 103   |
| apigenin                  |           | 44             | 46  | 94  | 59   | 76    |
| caffeic                   |           | 96             | 61  | 69  | 64   | 79    |
| chrysin                   |           | 96             | 93  | 96  | 80   | 88    |
| cinnamic acid             |           | 101            | 73  | 101 | 71   | 85    |
| eriodictyol               |           | 105            | 90  | 94  | 56   | 91    |
| ferulic acid              |           | 96             | 72  | 98  | 79   | 74    |
| galangin                  |           | 60             | 45  | 102 | 56   | 90    |
| gallic acid               |           | 47             | 45  | 66  | 62   | 66    |
| genistein                 |           | 93             | 102 | 104 | 102  | 76    |
| luteolin                  |           | 41             | 91  | 88  | 57   | 50    |
| naringenin                |           | 59             | 99  | 85  | 68   | 106   |
| p-coumaric acid           |           | 108            | 62  | 65  | 83   | 82    |
| pinobanksin               |           | 74             | 99  | 85  | 72   | 106   |
| pinocembrin               |           | 66             | 84  | 106 | 102  | 108   |
| quercetin                 |           | 47             | 68  | 100 | 35   | 85    |
| rosmarinic acid           |           | 72             | 61  | 94  | 82   | 107   |
| salicylic acid            |           | 66             | 88  | 56  | 106  | 52    |
| syringic acid             |           | 62             | 61  | 88  | 87   | 99    |
| taxifolin                 |           | 47             | 48  | 67  | 42   | 52    |
| vanillic acid             |           | 86             | 101 | 78  | 101  | 95    |
| vanillin                  |           | 95             | 107 | 98  | 84   | 78    |

**Table S5.** Acquired matrix effects (MEs) per honey matrix.

| Sample ID<br>Analytes     |  | Matrix effect (ME%) |      |      |      |       |
|---------------------------|--|---------------------|------|------|------|-------|
|                           |  | Blossom             | Fir  | Oak  | Pine | Thyme |
| 2,5 dihydroxybeznoic acid |  | 14                  | 12   | 28   | 21   | 32    |
| 3,4 dihydroxybenzoic acid |  | 31                  | 33   | 20   | 22   | 32    |
| 4 hydroxybezoic acid      |  | 32                  | 31   | 32   | 33   | 33    |
| apigenin                  |  | 4.0                 | 1.3  | 9    | 9    | 31    |
| caffeic                   |  | 32                  | 11   | 28   | 33   | 30    |
| chrysin                   |  | 28                  | 17   | 26   | 33   | 17    |
| cinnamic acid             |  | -7.0                | 3.8  | 5.7  | 12   | 28    |
| eriodictyol               |  | 11                  | 13   | -1.5 | 3.1  | 11    |
| ferulic acid              |  | 6.0                 | 9.1  | 24   | 25   | 34    |
| galangin                  |  | -6.8                | -2.2 | -6.2 | -10  | -9.3  |
| gallic acid               |  | 33                  | 33   | 34   | 31   | 31    |
| genistein                 |  | 7.9                 | 3.1  | 13   | 12   | 33    |
| hesperitin                |  | 11                  | 11   | 11   | 17   | 18    |
| luteolin                  |  | 2.0                 | -4.4 | -21  | -9.3 | 30    |
| naringenin                |  | 32                  | 14   | 33   | 32   | 25    |
| p-coumaric acid           |  | 6.1                 | 1.2  | 33   | 29   | 31    |
| pinobanksin               |  | 32                  | 13   | 22   | 29   | 22    |
| pinocembrin               |  | 19                  | -3.3 | 11   | 22   | 8.1   |
| quercetin                 |  | -9.2                | 12   | -16  | -12  | 6.2   |
| rosmarinic acid           |  | -14                 | -7.1 | -12  | -9.1 | 12    |
| salicylic acid            |  | 15                  | 25   | 32   | 25   | 34    |
| syringic acid             |  | 8.3                 | 6.0  | 6.2  | 7.0  | 27    |
| taxifolin                 |  | 24                  | 32   | 34   | 32   | 33    |
| vanillic acid             |  | 18                  | 10   | 19   | 18   | 30    |
| vanillin                  |  | -1.4                | 1.0  | -1.0 | 10   | 34    |

**Table S6.** LC gradient elution and flow rate program

| Time (min) | Flow rate (mL/min) | %A  | %B   |
|------------|--------------------|-----|------|
| 0          | 0.2                | 99  | 1    |
| 1.0        | 0.2                | 99  | 1    |
| 3.0        | 0.2                | 61  | 39   |
| 14.0       | 0.4                | 0.1 | 99.9 |
| 16.0       | 0.48               | 0.1 | 99.9 |
| 16.1       | 0.48               | 99  | 1    |
| 19.0       | 0.48               | 99  | 1    |
| 19.1       | 0.2                | 99  | 1    |
| 20.0       | 0.2                | 99  | 1    |

## Target Screening Database

**Table S7.** Target list of phenolic compounds

| Compound                                         | Molecular formula                              | [M-H] <sup>-</sup> m/z | tR (min) | q1 m/z   | q1 formula                                     | q2 m/z   | q2 formula                                     | q3 m/z   | q3 formula                                     |
|--------------------------------------------------|------------------------------------------------|------------------------|----------|----------|------------------------------------------------|----------|------------------------------------------------|----------|------------------------------------------------|
| 2,5-dihydroxybenzoic acid (gentistic acid)       | C <sub>7</sub> H <sub>6</sub> O <sub>4</sub>   | 153.0193               | 1.9      | 108.0215 | C <sub>6</sub> H <sub>4</sub> O <sub>2</sub>   | 109.0278 | C <sub>6</sub> H <sub>5</sub> O <sub>2</sub>   |          |                                                |
| 3,4- dihydroxybenzoic acid (Protocatechuic acid) | C <sub>7</sub> H <sub>6</sub> O <sub>4</sub>   | 153.0193               | 1.3      | 109.0294 | C <sub>6</sub> H <sub>5</sub> O <sub>2</sub>   | 108.0218 | C <sub>6</sub> H <sub>4</sub> O <sub>2</sub>   |          |                                                |
| 4-hydroxybenzoic acid                            | C <sub>7</sub> H <sub>6</sub> O <sub>3</sub>   | 137.0244               | 1.4      | 93.0342  | C <sub>6</sub> H <sub>5</sub> O                | 65.0398  | C <sub>5</sub> H <sub>5</sub>                  |          |                                                |
| Apigenin                                         | C <sub>15</sub> H <sub>10</sub> O <sub>5</sub> | 269.0455               | 8.2      | 269.0455 | C <sub>15</sub> H <sub>9</sub> O <sub>5</sub>  | 117.0340 | C <sub>8</sub> H <sub>5</sub> O                | 151.0031 | C <sub>7</sub> H <sub>3</sub> O <sub>4</sub>   |
| Caffeic acid                                     | C <sub>9</sub> H <sub>8</sub> O <sub>4</sub>   | 179.0349               | 1.4      | 135.0453 | C <sub>8</sub> H <sub>7</sub> O <sub>2</sub>   | 134.0346 | C <sub>8</sub> H <sub>6</sub> O <sub>2</sub>   |          |                                                |
| Chrysin                                          | C <sub>15</sub> H <sub>10</sub> O <sub>4</sub> | 253.0506               | 9.8      | 63.024   | C <sub>5</sub> H <sub>3</sub>                  | 143.0502 | C <sub>10</sub> H <sub>7</sub> O               | 209.0608 | C <sub>14</sub> H <sub>9</sub> O <sub>2</sub>  |
| Cinnamic acid                                    | C <sub>9</sub> H <sub>8</sub> O <sub>2</sub>   | 147.0452               | 4.1      | 103.0553 | C <sub>8</sub> H <sub>7</sub>                  | 147.0446 | C <sub>9</sub> H <sub>7</sub> O <sub>2</sub>   |          |                                                |
| Eriodictyol                                      | C <sub>15</sub> H <sub>12</sub> O <sub>6</sub> | 287.0561               | 6.3      | 151.0038 | C <sub>7</sub> H <sub>3</sub> O <sub>4</sub>   | 135.045  | C <sub>8</sub> H <sub>7</sub> O <sub>2</sub>   |          |                                                |
| Ferulic acid                                     | C <sub>10</sub> H <sub>10</sub> O <sub>4</sub> | 193.0506               | 2.7      | 134.0361 | C <sub>8</sub> H <sub>6</sub> O <sub>2</sub>   | 178.026  | C <sub>9</sub> H <sub>6</sub> O <sub>4</sub>   |          |                                                |
| Galangin                                         | C <sub>15</sub> H <sub>10</sub> O <sub>5</sub> | 269.0455               | 9.9      | 213.0557 | C <sub>13</sub> H <sub>9</sub> O <sub>3</sub>  | 169.0659 | C <sub>12</sub> H <sub>9</sub> O               | 143.0502 | C <sub>10</sub> H <sub>7</sub> O               |
| Gallic acid                                      | C <sub>7</sub> H <sub>6</sub> O <sub>5</sub>   | 169.0142               | 1.2      | 125.0244 | C <sub>6</sub> H <sub>5</sub> O <sub>3</sub>   | 69.0344  | C <sub>4</sub> H <sub>5</sub> O                | 97.0295  | C <sub>5</sub> H <sub>5</sub> O <sub>2</sub>   |
| Genistein                                        | C <sub>15</sub> H <sub>10</sub> O <sub>5</sub> | 269.0455               | 7.3      | 63.024   | C <sub>5</sub> H <sub>3</sub>                  | 133.0295 | C <sub>8</sub> H <sub>5</sub> O <sub>2</sub>   | 159.0452 | C <sub>10</sub> H <sub>7</sub> O <sub>2</sub>  |
| Hesperitin                                       | C <sub>16</sub> H <sub>14</sub> O <sub>6</sub> | 301.0718               | 7.5      | 164.0115 | C <sub>8</sub> H <sub>4</sub> O <sub>4</sub>   | 151.0037 | C <sub>7</sub> H <sub>3</sub> O <sub>4</sub>   | 242.0585 | C <sub>14</sub> H <sub>10</sub> O <sub>4</sub> |
| Luteolin                                         | C <sub>15</sub> H <sub>10</sub> O <sub>6</sub> | 285.0405               | 7.4      | 285.0405 | C <sub>15</sub> H <sub>9</sub> O <sub>6</sub>  | 133.0287 | C <sub>8</sub> H <sub>5</sub> O <sub>2</sub>   |          |                                                |
| Naringenin                                       | C <sub>15</sub> H <sub>12</sub> O <sub>5</sub> | 271.0612               | 7.0      | 119.0502 | C <sub>8</sub> H <sub>7</sub> O                | 151.0037 | C <sub>7</sub> H <sub>3</sub> O <sub>4</sub>   | 107.0138 | C <sub>6</sub> H <sub>3</sub> O <sub>2</sub>   |
| p-coumaric acid                                  | C <sub>9</sub> H <sub>8</sub> O <sub>3</sub>   | 163.0401               | 2.5      | 119.0502 | C <sub>8</sub> H <sub>7</sub> O                | 93.0344  | C <sub>6</sub> H <sub>5</sub> O                |          |                                                |
| Pinobanksin                                      | C <sub>15</sub> H <sub>12</sub> O <sub>5</sub> | 271.0612               | 7.2      | 253.0495 | C <sub>15</sub> H <sub>9</sub> O <sub>4</sub>  | 197.0597 | C <sub>13</sub> H <sub>9</sub> O <sub>2</sub>  | 225.0546 | C <sub>14</sub> H <sub>9</sub> O <sub>3</sub>  |
| Pinocembrin                                      | C <sub>15</sub> H <sub>12</sub> O <sub>4</sub> | 255.0663               | 9.0      | 151.0037 | C <sub>7</sub> H <sub>3</sub> O <sub>4</sub>   | 213.0557 | C <sub>13</sub> H <sub>9</sub> O <sub>3</sub>  | 107.0139 | C <sub>6</sub> H <sub>3</sub> O <sub>2</sub>   |
| Quercetin                                        | C <sub>15</sub> H <sub>10</sub> O <sub>7</sub> | 301.0354               | 7.1      | 151.0036 | C <sub>7</sub> H <sub>3</sub> O <sub>4</sub>   | 301.0354 | C <sub>15</sub> H <sub>9</sub> O <sub>7</sub>  | 121.0288 | C <sub>7</sub> H <sub>5</sub> O <sub>2</sub>   |
| Rosmarinic acid                                  | C <sub>18</sub> H <sub>16</sub> O <sub>8</sub> | 359.0772               | 4.3      | 161.0233 | C <sub>9</sub> H <sub>5</sub> O <sub>3</sub>   | 197.0444 | C <sub>9</sub> H <sub>9</sub> O <sub>5</sub>   | 179.0338 | C <sub>9</sub> H <sub>7</sub> O <sub>4</sub>   |
| salicylic acid                                   | C <sub>7</sub> H <sub>6</sub> O <sub>3</sub>   | 137.0244               | 3.2      | 93.0340  | C <sub>6</sub> H <sub>5</sub> O                | 65.0399  | C <sub>5</sub> H <sub>5</sub>                  |          |                                                |
| Syringic acid                                    | C <sub>9</sub> H <sub>10</sub> O <sub>5</sub>  | 197.0455               | 1.4      | 123.0080 | C <sub>6</sub> H <sub>3</sub> O <sub>3</sub>   | 166.9976 | C <sub>7</sub> H <sub>3</sub> O <sub>5</sub>   |          |                                                |
| Taxifolin                                        | C <sub>15</sub> H <sub>12</sub> O <sub>7</sub> | 303.0510               | 4.7      | 125.0227 | C <sub>6</sub> H <sub>5</sub> O <sub>3</sub>   | 285.0408 | C <sub>15</sub> H <sub>9</sub> O <sub>6</sub>  | 153.0193 | C <sub>7</sub> H <sub>5</sub> O <sub>4</sub>   |
| Vanillic acid                                    | C <sub>8</sub> H <sub>8</sub> O <sub>4</sub>   | 167.0350               | 1.4      | 125.0244 | C <sub>6</sub> H <sub>5</sub> O <sub>3</sub>   | 152.0115 | C <sub>7</sub> H <sub>4</sub> O <sub>4</sub>   |          |                                                |
| Vanillin                                         | C <sub>8</sub> H <sub>8</sub> O <sub>3</sub>   | 151.0401               | 4.6      | 136.0158 | C <sub>7</sub> H <sub>4</sub> O <sub>3</sub>   | 108.0217 | C <sub>6</sub> H <sub>4</sub> O <sub>2</sub>   |          |                                                |
| 2-cis,4-trans-Abscisic acid                      | C <sub>15</sub> H <sub>20</sub> O <sub>4</sub> | 263.1289               | 5.0      | 204.1156 | C <sub>13</sub> H <sub>16</sub> O <sub>2</sub> | 219.1391 | C <sub>14</sub> H <sub>19</sub> O <sub>2</sub> | 151.0765 | C <sub>9</sub> H <sub>11</sub> O <sub>2</sub>  |
| sakuranetin                                      | C <sub>16</sub> H <sub>14</sub> O <sub>5</sub> | 285.0769               | 9.40     | 119.0502 | C <sub>8</sub> H <sub>7</sub> O                | 165.0193 | C <sub>8</sub> H <sub>5</sub> O <sub>4</sub>   | 93.0346  | C <sub>6</sub> H <sub>5</sub> O                |
| acacetin                                         | C <sub>16</sub> H <sub>12</sub> O <sub>5</sub> | 283.0612               | 10.00    | 268.0377 | C <sub>15</sub> H <sub>8</sub> O <sub>5</sub>  | 268.0455 | C <sub>15</sub> H <sub>9</sub> O <sub>5</sub>  | 239.035  | C <sub>14</sub> H <sub>7</sub> O <sub>4</sub>  |

Table S8. Suspect list of bioactive compounds encountered in honey

| ID | Compound name                 | Molecular Formula                               | Predicted tR (min) | Experimental tR (min) | Monoisotopic Mass | [M] <sup>-</sup> | [M-H] <sup>-</sup> | [M-H <sub>2</sub> O-H] <sup>-</sup> | [M+HCOOH-H] <sup>-</sup> | [M+CH <sub>3</sub> COOH-H] <sup>-</sup> | Qual. 1  | Qual. 2  | Qual. 3  | Qual. 4  | Qual. 5  | Reference |
|----|-------------------------------|-------------------------------------------------|--------------------|-----------------------|-------------------|------------------|--------------------|-------------------------------------|--------------------------|-----------------------------------------|----------|----------|----------|----------|----------|-----------|
| 1  | Tricetin                      | C <sub>15</sub> H <sub>10</sub> O <sub>7</sub>  | 7.61               | 8.17                  | 302.0427          | 302.0432         | 301.0354           | 283.0248                            | 347.0409                 | 361.0565                                | 301.0407 | 302.0430 | 303.0484 | 149.0275 |          | 12        |
| 2  | Quercetin 3-Methyl Ether      | C <sub>16</sub> H <sub>12</sub> O <sub>7</sub>  | 7.07               |                       | 316.0583          | 316.0589         | 315.0510           | 297.0405                            | 361.0565                 | 375.0722                                | 271.0269 | 300.0280 | 255.0342 |          |          | 12        |
| 3  | Quercetin 3,4-Diglycoside     | C <sub>27</sub> H <sub>30</sub> O <sub>17</sub> | 5.60               |                       | 626.1483          | 626.1488         | 625.1410           | 607.1305                            | 671.1465                 | 685.1622                                | 463.0887 | 301.0354 | 300.0293 | 625.1392 | 179.0007 | 12        |
| 4  | Quercetin-O-Rhamnoside        | C <sub>21</sub> H <sub>20</sub> O <sub>11</sub> | 7.03               |                       | 448.1006          | 448.1011         | 447.0933           | 429.0827                            | 493.0988                 | 507.1144                                | 447.0979 | 301.0380 | 255.0305 | 300.0291 | 284.0323 | 12        |
| 5  | Kaempferol                    | C <sub>15</sub> H <sub>10</sub> O <sub>6</sub>  | 7.26               |                       | 286.0477          | 286.0483         | 285.0405           | 267.0299                            | 331.0459                 | 345.0616                                | 285.0399 | 159.0378 | 117.0346 | 286.0442 | 151.0034 | 12        |
| 6  | Kaempferol 3-Ome              | C <sub>16</sub> H <sub>12</sub> O <sub>6</sub>  | 7.48               |                       | 300.0634          | 300.0639         | 299.0561           | 281.0455                            | 345.0616                 | 359.0772                                |          |          |          |          |          | 12        |
| 7  | Kaempferol-7-O-Rhamnoside     | C <sub>21</sub> H <sub>20</sub> O <sub>10</sub> | 7.51               | 7.96                  | 432.1056          | 432.1062         | 431.0984           | 413.0878                            | 477.1038                 | 491.1195                                | 285.0399 | 284.0326 | 431.0991 | 151.0041 |          | 12        |
| 8  | Kaempferol-3-O-Glycosyl       | C <sub>21</sub> H <sub>20</sub> O <sub>11</sub> | 5.93               |                       | 448.1006          | 448.1011         | 447.0933           | 429.0827                            | 493.0988                 | 507.1144                                | 447.0979 | 301.038  | 255.0305 | 300.0291 | 284.0323 | 12        |
| 9  | Kaempferol-3-Rhamnoside       | C <sub>21</sub> H <sub>20</sub> O <sub>10</sub> | 7.10               |                       | 431.0978          | 431.0984         | 430.0905           | 412.0800                            | 476.0960                 | 490.1117                                |          |          |          |          |          | 12        |
| 10 | Kaempferol-7-O-Glycosyl       | C <sub>21</sub> H <sub>20</sub> O <sub>11</sub> | 6.25               |                       | 448.1006          | 448.1011         | 447.0933           | 429.0827                            | 493.0988                 | 507.1144                                | 447.0931 | 285.0443 | 284.0285 | 150.9993 | 286.0430 | 12        |
| 11 | Myricetin 3-Ome               | C <sub>16</sub> H <sub>12</sub> O <sub>8</sub>  | 6.91               |                       | 332.0532          | 332.0538         | 331.0459           | 313.0354                            | 377.0514                 | 391.0671                                |          |          |          |          |          | 12        |
| 12 | Isorhamnetin                  | C <sub>16</sub> H <sub>12</sub> O <sub>7</sub>  | 7.63               |                       | 316.0583          | 316.0589         | 315.0510           | 297.0405                            | 361.0565                 | 375.0722                                | 315.0504 | 300.0272 | 151.0038 | 107.0134 | 108.0212 | 12        |
| 13 | 4-Dimethylaminobenzoic Acid   | C <sub>9</sub> H <sub>11</sub> NO <sub>2</sub>  | 3.21               | 1.68                  | 165.0790          | 165.0795         | 164.0717           | 146.0611                            | 210.0772                 | 224.0928                                |          |          |          |          |          | 12        |
| 14 | Chlorogenic Acid              | C <sub>16</sub> H <sub>18</sub> O <sub>9</sub>  | 3.70               |                       | 354.0951          | 354.0956         | 353.0878           | 335.0772                            | 399.0933                 | 413.1089                                | 191.0575 | 353.0866 | 179.0378 | 161.0270 | 87.0068  | 12        |
| 15 | Homogentisic Acid             | C <sub>8</sub> H <sub>8</sub> O <sub>4</sub>    | 3.29               |                       | 168.0423          | 168.0428         | 167.0350           | 149.0244                            | 213.0405                 | 227.0561                                | 123.0441 | 122.0361 | 108.0203 | 167.0342 | 124.0472 | 12        |
| 16 | Methyl Syringate              | C <sub>10</sub> H <sub>12</sub> O <sub>5</sub>  | 5.77               |                       | 212.0685          | 212.0690         | 211.0612           | 193.0506                            | 257.0667                 | 271.0823                                |          |          |          |          |          | 12        |
| 17 | Acacetin                      | C <sub>16</sub> H <sub>12</sub> O <sub>5</sub>  | 7.99               |                       | 284.0685          | 284.0690         | 283.0612           | 265.0506                            | 329.0667                 | 343.0823                                | 268.0362 | 283.0609 | 269.0339 | 284.0623 | 240.0442 | 12        |
| 18 | 2-trans,4-trans-abscisic acid | C <sub>15</sub> H <sub>20</sub> O <sub>4</sub>  | 4.44               |                       | 264.1362          | 264.1367         | 263.1289           | 245.1183                            | 309.1344                 | 323.1500                                | 153.0914 | 219.1382 | 204.1150 | 201.1269 | 203.1059 | 12        |
| 19 | 2-cis,4-trans-abscisic acid   | C <sub>15</sub> H <sub>20</sub> O <sub>4</sub>  | 4.44               | 5.95                  | 264.1362          | 264.1367         | 263.1289           | 245.1183                            | 309.1344                 | 323.1500                                | 153.0914 | 219.1382 | 204.1150 | 201.1269 | 203.1059 | 12        |
| 20 | Ellagic Acid                  | C <sub>14</sub> H <sub>6</sub> O <sub>8</sub>   | 4.87               |                       | 302.0063          | 302.0068         | 300.9990           | 282.9884                            | 347.0045                 | 361.0201                                | 283.9935 | 300.9970 | 257.0060 | 229.0137 | 201.0191 | 12        |
| 21 | DL-p-Hydroxyphenyllactic Acid | C <sub>9</sub> H <sub>10</sub> O <sub>4</sub>   | 4.25               |                       | 182.0579          | 182.0585         | 181.0506           | 163.0401                            | 227.0561                 | 241.0718                                | 163.0392 | 135.0440 | 119.0490 | 134.0370 | 181.0499 | 12        |
| 22 | Phenylacetic Acid             | C <sub>8</sub> H <sub>8</sub> O <sub>2</sub>    | 4.28               |                       | 136.0524          | 136.0530         | 135.0452           | 117.0346                            | 181.0506                 | 195.0663                                | 135.0441 | 134.0362 | 107.0489 | 106.0411 | 136.0476 | 12        |
| 23 | 2-Methoxybenzoic Acid         | C <sub>8</sub> H <sub>8</sub> O <sub>3</sub>    | 3.05               |                       | 152.0473          | 152.0479         | 151.0401           | 133.0295                            | 197.0455                 | 211.0612                                |          |          |          |          |          | 12        |
| 24 | Trimethoxybenzoic Acid        | C <sub>10</sub> H <sub>12</sub> O <sub>5</sub>  | 3.41               |                       | 212.0685          | 212.0690         | 211.0612           | 193.0506                            | 257.0667                 | 271.0823                                |          |          |          |          |          | 12        |
| 25 | 4-Methoxyphenylacetic Acid    | C <sub>9</sub> H <sub>10</sub> O <sub>3</sub>   | 4.48               |                       | 166.0630          | 166.0635         | 165.0557           | 147.0452                            | 211.0612                 | 225.0768                                |          |          |          |          |          | 12        |
| 26 | Quercetin 3,3'-Dimethyl Ether | C <sub>17</sub> H <sub>14</sub> O <sub>7</sub>  | 7.93               |                       | 330.0740          | 330.0745         | 329.0667           | 311.0561                            | 375.0722                 | 389.0878                                |          |          |          |          |          | 12        |

| ID | Compound name                | Molecular Formula                                             | Predicted tR (min) | Experimental tR (min) | Monoisotopic Mass | [M] <sup>-</sup> | [M-H] <sup>-</sup> | [M-H <sub>2</sub> O-H] <sup>-</sup> | [M+HCOOH-H] <sup>-</sup> | [M+CH <sub>3</sub> COOH-H] <sup>-</sup> | Qual. 1  | Qual. 2  | Qual. 3  | Qual. 4  | Qual. 5  | Reference |
|----|------------------------------|---------------------------------------------------------------|--------------------|-----------------------|-------------------|------------------|--------------------|-------------------------------------|--------------------------|-----------------------------------------|----------|----------|----------|----------|----------|-----------|
| 27 | 3-Hydroxybenzoic Acid        | C <sub>7</sub> H <sub>6</sub> O <sub>3</sub>                  | 3.34               |                       | 138.0317          | 138.0322         | 137.0244           | 119.0139                            | 183.0299                 | 197.0455                                | 93.0332  | 137.0233 | 94.0365  | 138.0268 | 56.3217  | 12        |
| 28 | Dicaffeoylquinic Acid        | C <sub>25</sub> H <sub>24</sub> O <sub>12</sub>               | 7.19               |                       | 516.1268          | 516.1273         | 515.1195           | 497.1089                            | 561.1250                 | 575.1406                                |          |          |          |          |          | 12        |
| 29 | Prenyl Caffeate              | C <sub>14</sub> H <sub>16</sub> O <sub>4</sub>                | 9.12               |                       | 248.1049          | 248.1054         | 247.0976           | 229.0870                            | 293.1031                 | 307.1187                                |          |          |          |          |          | 12        |
| 30 | Rhamnetin                    | C <sub>16</sub> H <sub>12</sub> O <sub>7</sub>                | 7.89               |                       | 316.0583          | 316.0589         | 315.0510           | 297.0405                            | 361.0565                 | 375.0722                                | 315.0505 | 165.0194 | 121.0294 | 300.0279 | 193.0141 | 12        |
| 31 | Kaempferide                  | C <sub>16</sub> H <sub>12</sub> O <sub>6</sub>                | 7.88               |                       | 300.0634          | 300.0639         | 299.0561           | 281.0455                            | 345.0616                 | 359.0772                                | 284.0323 | 299.0555 | 151.0037 | 164.0114 | 300.0624 | 12        |
| 32 | Sakuranetin                  | C <sub>16</sub> H <sub>14</sub> O <sub>5</sub>                | 8.06               | 9.25                  | 286.0841          | 286.0847         | 285.0768           | 267.0663                            | 331.0823                 | 345.0980                                | 285.0779 | 165.0199 | 119.0506 | 286.0808 | 243.0664 | 12        |
| 33 | Alpinetin                    | C <sub>16</sub> H <sub>14</sub> O <sub>4</sub>                | 7.73               |                       | 270.0892          | 270.0898         | 269.0819           | 251.0714                            | 315.0874                 | 329.1031                                |          |          |          |          |          | 12        |
| 34 | Pinostrobin                  | C <sub>16</sub> H <sub>14</sub> O <sub>4</sub>                | 8.23               |                       | 270.0892          | 270.0898         | 269.0819           | 251.0714                            | 315.0874                 | 329.1031                                |          |          |          |          |          | 12        |
| 35 | Tectochrysin                 | C <sub>16</sub> H <sub>12</sub> O <sub>4</sub>                | 8.22               | 8.58                  | 268.0736          | 268.0741         | 267.0663           | 249.0557                            | 313.0718                 | 327.0874                                | 252.0408 | 267.0659 | 268.0684 | 224.0472 | 269.0648 | 12        |
| 36 | Dihydroxyflavone             | C <sub>15</sub> H <sub>10</sub> O <sub>4</sub>                | 8.12               |                       | 254.0579          | 254.0585         | 253.0506           | 235.0401                            | 299.0561                 | 313.0718                                |          |          |          |          |          | 12        |
| 37 | DL-β-Phenyllactic acid       | C <sub>9</sub> H <sub>10</sub> O <sub>3</sub>                 | 3.65               | 3.13                  | 166.0630          | 166.0635         | 165.0557           | 147.0452                            | 211.0612                 | 225.0768                                |          |          |          |          |          | 12        |
| 38 | Kojic Acid                   | C <sub>6</sub> H <sub>6</sub> O <sub>4</sub>                  | 3.01               |                       | 142.0266          | 142.0272         | 141.0193           | 123.0088                            | 187.0248                 | 201.0405                                | 141.0187 | 111.0091 | 113.0238 |          |          | 12        |
| 39 | Dehydrovomifoliol            | C <sub>13</sub> H <sub>18</sub> O <sub>3</sub>                | 5.42               | 5.07                  | 222.1256          | 222.1261         | 221.1183           | 203.1078                            | 267.1238                 | 281.1394                                |          |          |          |          |          | 12        |
| 40 | Benzoic Acid                 | C <sub>7</sub> H <sub>6</sub> O <sub>2</sub>                  | 2.94               |                       | 122.0368          | 122.0373         | 121.0295           | 103.0189                            | 167.0350                 | 181.0506                                | 121.0304 | 92.0263  | 120.0213 | 93.0348  |          | 12        |
| 41 | Lumichrome                   | C <sub>12</sub> H <sub>10</sub> N <sub>4</sub> O <sub>2</sub> | 5.85               | 6.42                  | 242.0804          | 242.0809         | 241.0731           | 223.0625                            | 287.0786                 | 301.0942                                |          |          |          |          |          | 12        |
| 42 | Rutin                        | C <sub>27</sub> H <sub>30</sub> O <sub>16</sub>               | 6.29               |                       | 610.1534          | 610.1539         | 609.1461           | 591.1355                            | 655.1516                 | 669.1672                                | 609.1474 | 301.0366 | 300.0319 | 271.0274 | 343.0538 | 12        |
| 43 | Isoquercetin                 | C <sub>21</sub> H <sub>20</sub> O <sub>12</sub>               | 5.91               |                       | 464.0955          | 464.0960         | 463.0882           | 445.0776                            | 509.0937                 | 523.1093                                | 463.0891 | 301.0363 | 300.0294 | 271.0248 | 151.0037 | 12        |
| 44 | Sinapic Acid                 | C <sub>11</sub> H <sub>12</sub> O <sub>5</sub>                | 3.33               |                       | 224.0685          | 224.0690         | 223.0612           | 205.0506                            | 269.0667                 | 283.0823                                | 149.0258 | 193.0166 | 208.0402 | 164.0498 | 223.0607 | 12        |
| 45 | p-Methoxybenzoic Acid        | C <sub>8</sub> H <sub>8</sub> O <sub>3</sub>                  | 2.89               |                       | 152.0473          | 152.0479         | 151.0401           | 133.0295                            | 197.0455                 | 211.0612                                | 92.0263  | 136.0121 | 92.0155  | 141.7980 |          | 12        |
| 46 | Morin                        | C <sub>15</sub> H <sub>10</sub> O <sub>7</sub>                | 7.19               |                       | 302.0427          | 302.0432         | 301.0354           | 283.0248                            | 347.0409                 | 361.0565                                | 151.0021 | 271.0255 | 301.0363 | 299.0208 |          | 12        |
| 47 | p-Methoxycinnamic Acid       | C <sub>10</sub> H <sub>10</sub> O <sub>3</sub>                | 3.08               |                       | 178.0630          | 178.0635         | 177.0557           | 159.0452                            | 223.0612                 | 237.0768                                | 177.0552 | 103.0551 | 133.0663 | 131.0510 | 105.0702 | 12        |
| 48 | 4-Hydroxyacetophenone        | C <sub>8</sub> H <sub>8</sub> O <sub>2</sub>                  | 4.36               |                       | 136.0524          | 136.0530         | 135.0452           | 117.0346                            | 181.0506                 | 195.0663                                |          |          |          |          |          | 12        |
| 49 | 3,4-Dimethoxycinnamic Acid   | C <sub>11</sub> H <sub>12</sub> O <sub>4</sub>                | 3.32               |                       | 208.0736          | 208.0741         | 207.0663           | 189.0557                            | 253.0718                 | 267.0874                                | 207.0657 | 103.055  | 163.0763 | 133.0654 |          | 12        |
| 50 | Fisetin                      | C <sub>15</sub> H <sub>10</sub> O <sub>6</sub>                | 6.68               |                       | 286.0477          | 286.0483         | 285.0405           | 267.0299                            | 331.0459                 | 345.0616                                | 135.0093 | 285.0405 | 121.0287 | 255.0270 | 163.0029 | 12        |
| 51 | Naringin                     | C <sub>27</sub> H <sub>32</sub> O <sub>14</sub>               | 6.79               |                       | 580.1792          | 580.1798         | 579.1719           | 561.1614                            | 625.1774                 | 639.1931                                | 271.0641 | 579.1728 | 151.0029 | 459.1191 | 459.1089 | 12        |
| 52 | Hesperidin                   | C <sub>28</sub> H <sub>34</sub> O <sub>15</sub>               | 6.97               |                       | 610.1898          | 610.1903         | 609.1825           | 591.1719                            | 655.1880                 | 669.2036                                | 301.0736 | 609.1862 | 242.0585 | 151.0037 | 286.0483 | 12        |
| 53 | Isokaempferide               | C <sub>16</sub> H <sub>12</sub> O <sub>6</sub>                | 7.48               | 8.44                  | 300.0639          | 300.0639         | 299.0566           | 281.0455                            | 345.0621                 | 359.0778                                | 284.0332 | 255.0295 | 227.0346 | 256.037  | 228.0393 | 36        |
| 54 | Caffeic acid isoprenyl ester | C <sub>14</sub> H <sub>14</sub> O <sub>4</sub>                | 9.12               |                       | 246.0892          | 246.0898         | 245.0825           | 227.0714                            | 291.0880                 | 305.1037                                |          |          |          |          |          | 22        |
| 55 | (-)-Epigallocatechin gallate | C <sub>22</sub> H <sub>18</sub> O <sub>11</sub>               | 10.16              |                       | 458.0849          | 458.0855         | 457.0782           | 439.0671                            | 503.0837                 | 517.0994                                | 169.0163 | 305.0692 | 125.0254 | 166.9998 | 170.0198 | 37        |



| ID | Compound name              | Molecular<br>Formula | Predicted tR<br>(min) | Experimental<br>tR (min) | Monoisotopic<br>Mass | [M] <sup>-</sup> | [M-H] <sup>-</sup> | [M-H <sub>2</sub> O-H] <sup>-</sup> | [M+HCOOH-H] <sup>-</sup> | [M+CH <sub>3</sub> COOH-H] <sup>-</sup> | Qual. 1  | Qual. 2  | Qual. 3   | Qual. 4  | Qual. 5   | Reference |
|----|----------------------------|----------------------|-----------------------|--------------------------|----------------------|------------------|--------------------|-------------------------------------|--------------------------|-----------------------------------------|----------|----------|-----------|----------|-----------|-----------|
| 56 | 4-Hydroxyphenylacetic acid | C8H8O3               | 3.97                  |                          | 152.0473             | 152.0479         | 151.0406           | 133.0295                            | 197.0461                 | 211.0618                                | 107.0491 | 65.002   | 107.0127  | 151.0392 | 83.0126   | 38        |
| 57 | Arbutin                    | C12H16O7             | 5.55                  |                          | 272.0896             | 272.0901         | 271.0828           | 253.0717                            | 317.0883                 | 331.1040                                | 108.0217 | 109.0295 | 71.0139   | 85.0296  | 113.0244  | 39        |
| 58 | Baicalein                  | C15H10O5             | 7.81                  |                          | 270.0528             | 270.0534         | 269.0461           | 251.0350                            | 315.0516                 | 329.0673                                | 65.0029  | 139.0508 | 181.6102  | 145.0252 | 163.0064  | 40        |
| 59 | Astragalin                 | C21H20O11            | 5.93                  |                          | 448.1006             | 448.1011         | 447.0938           | 429.0827                            | 493.0993                 | 507.1150                                | 447.0934 | 448.0965 | 285.0401  | 284.0324 | 449.0981  | 41        |
| 60 | Kynurenic acid             | C10H7NO3             | 2.81                  |                          | 189.0426             | 189.0431         | 188.0358           | 170.0247                            | 234.0413                 | 248.0570                                | 144.0459 | 144.0594 | 102.04853 | 65.99768 | 115.04437 | 22        |
